# Supplementary material for: Diastereoselective reduction of the tricarbonyl moiety in bicyclic tetramates giving pyroglutamates
Source: Royal Society of Chemistry journal article supplement (doi:10.1039/c8ob00187a), 2018-01-01

## **SUPPORTING INFORMATION**

### **Diastereoselective reduction of the tricarbonyl moiety in bicyclic tetramates giving pyroglutamates**

**Laia Josa-Culleré, Kirsten E. Christensen and Mark G.  
Moloney**

**Department of Chemistry, Chemistry Research  
Laboratory, The University of Oxford, 12 Mansfield  
Road, Oxford. OX1 3TA.**

**e-mail: [mark.moloney@chem.ox.ac.uk](mailto:mark.moloney@chem.ox.ac.uk)**

<sup>1</sup>H NMR (500 MHz, CDCl<sub>3</sub>)

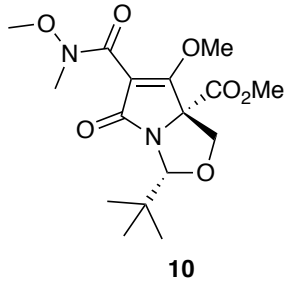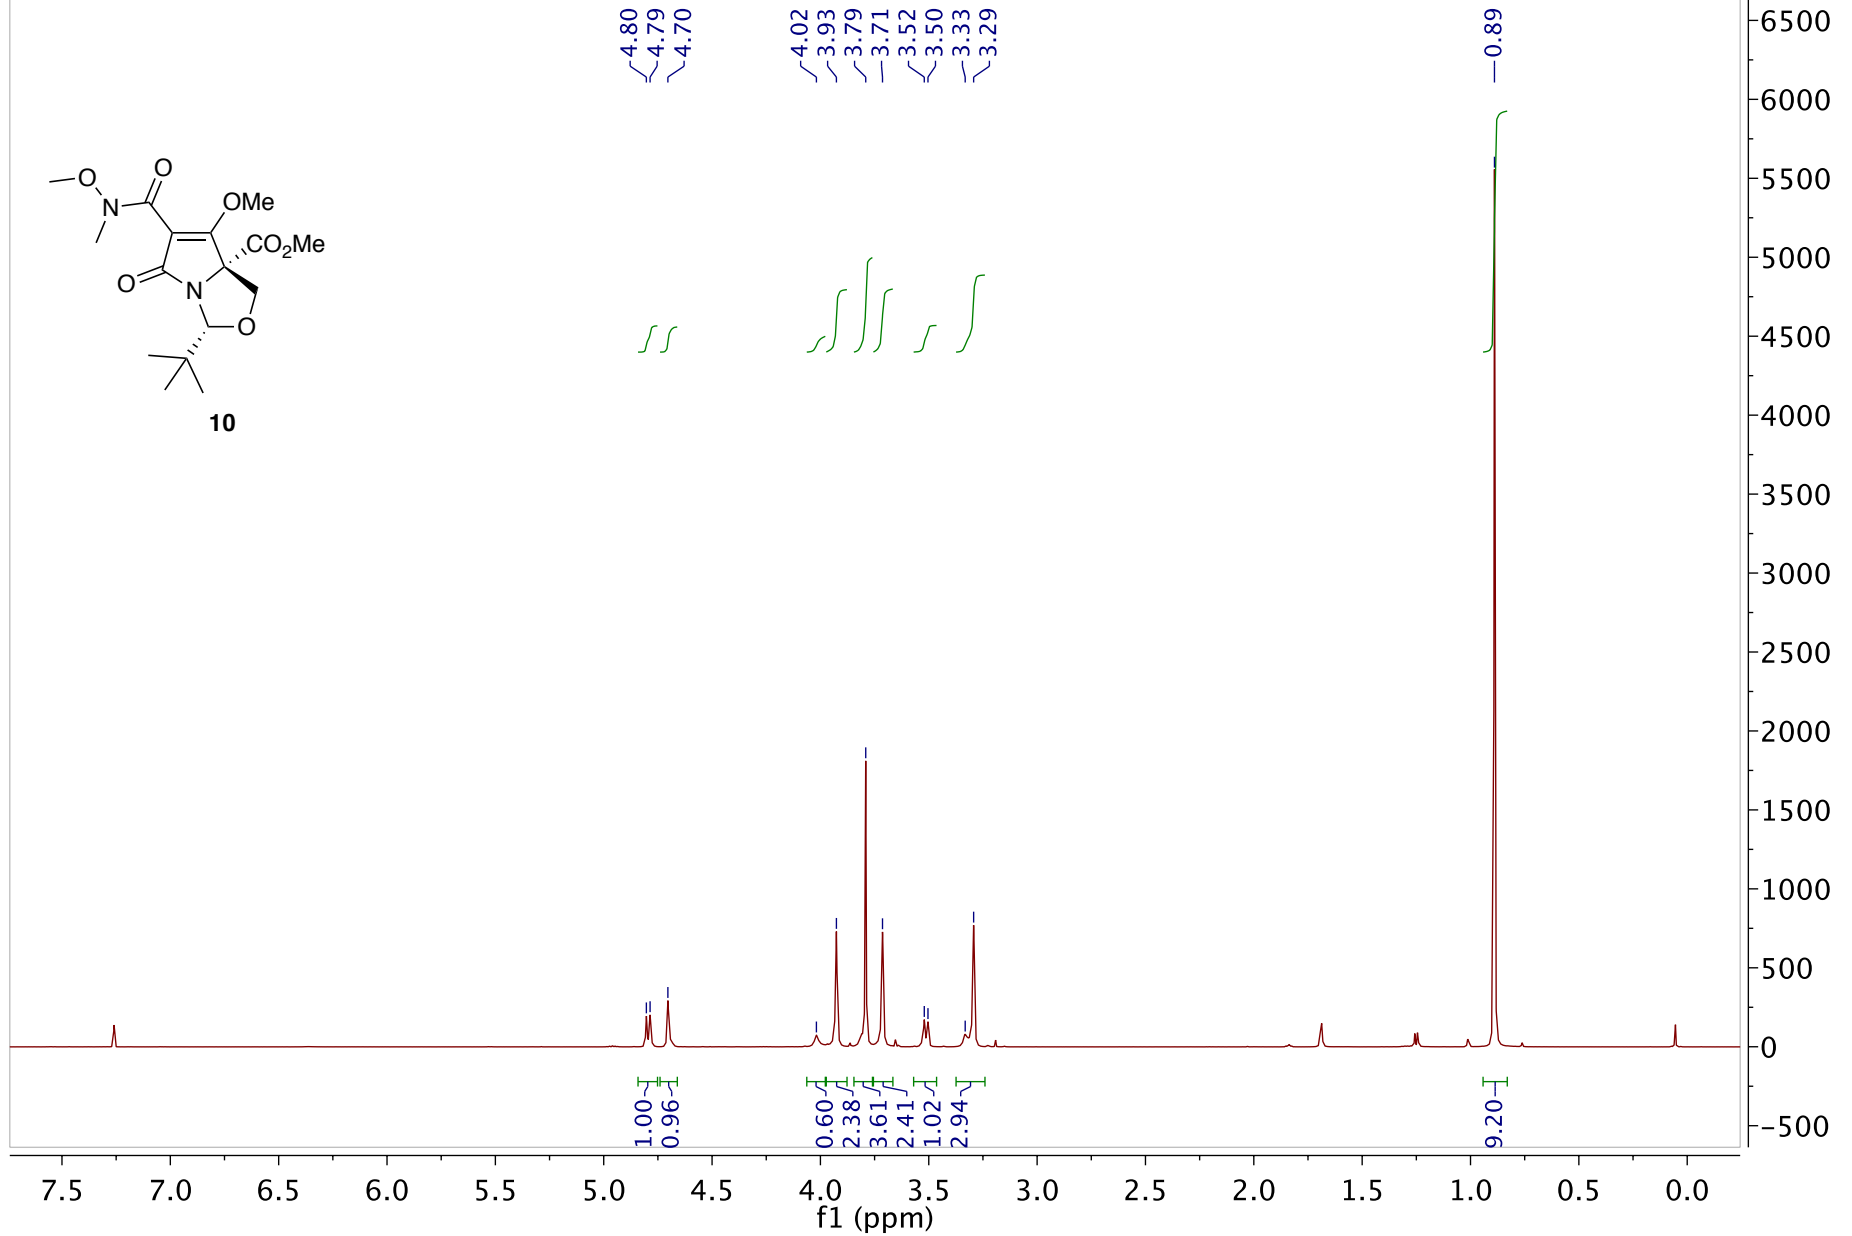

<sup>13</sup>C NMR (125 MHz, CDCl<sub>3</sub>)

174.9  
169.7  
168.3  
163.0

105.0

97.3

74.4

69.5

61.9

60.2

53.4

35.2

32.5

24.7

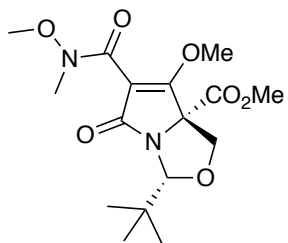

10

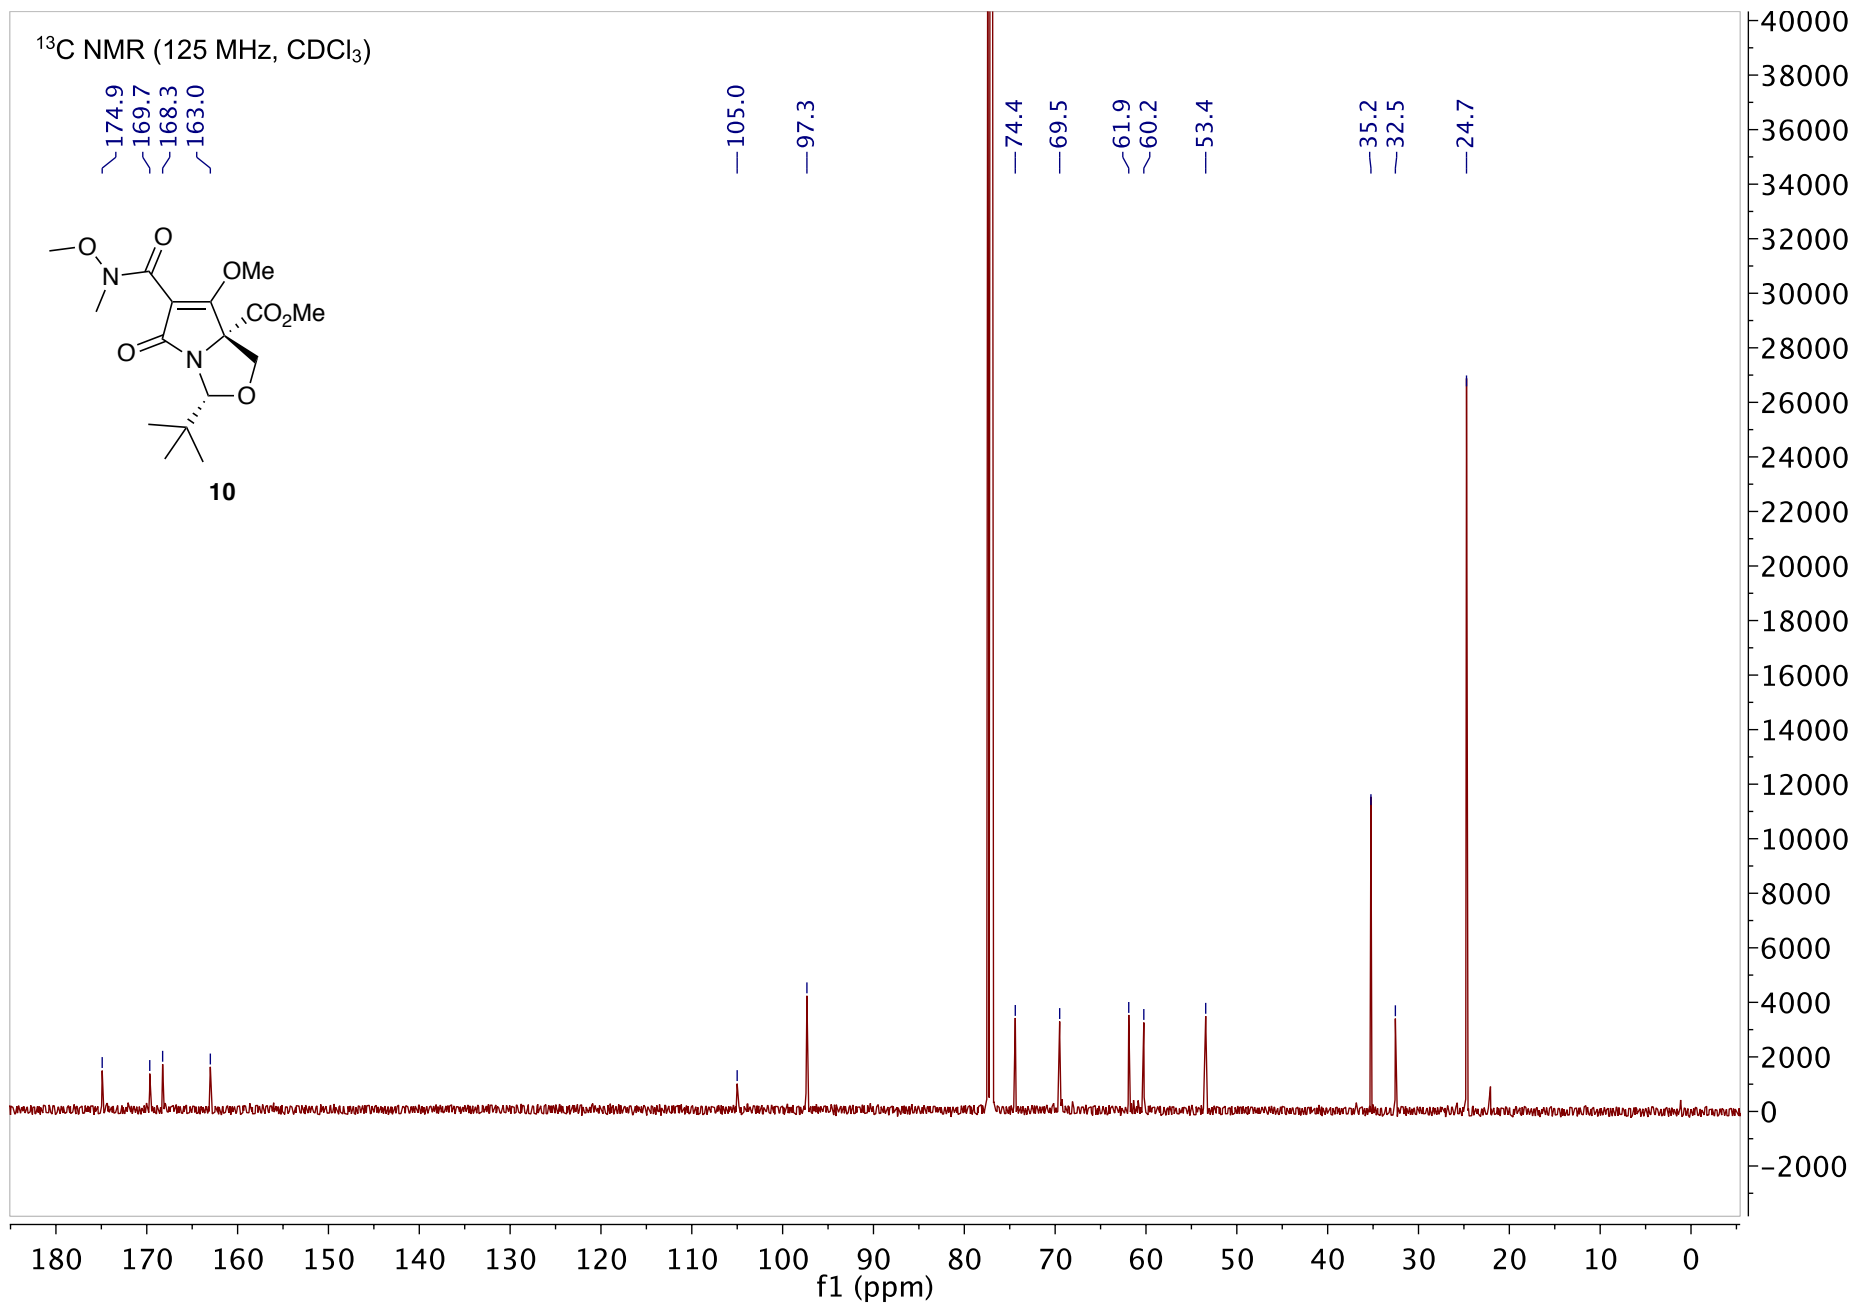

<sup>1</sup>H NMR (500 MHz, CDCl<sub>3</sub>)

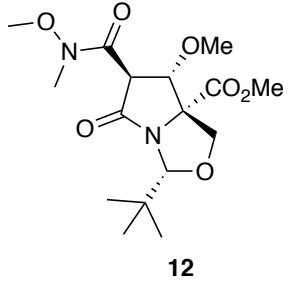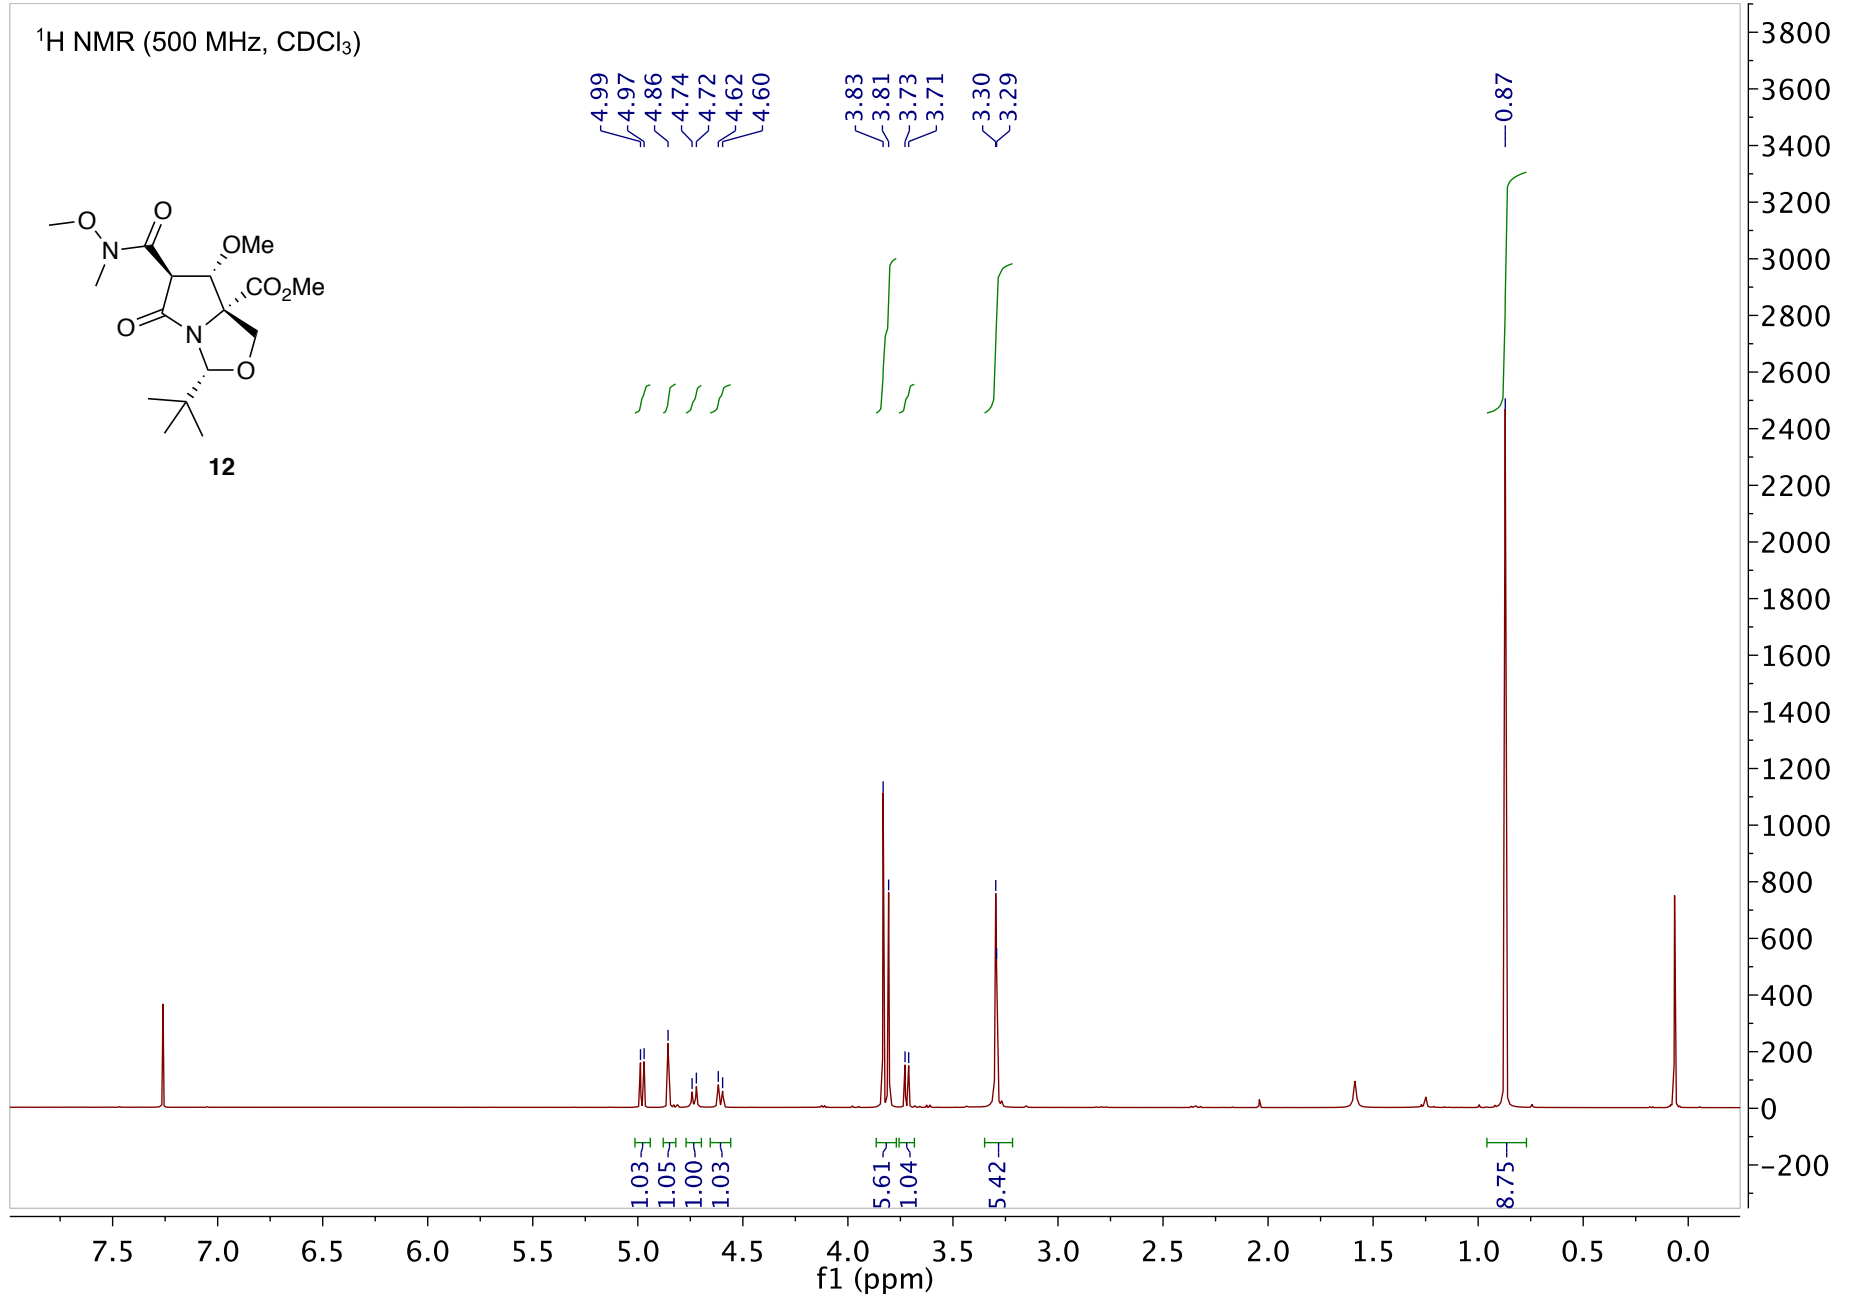

<sup>13</sup>C NMR (125 MHz, CDCl<sub>3</sub>)

170.4  
170.1  
167.5

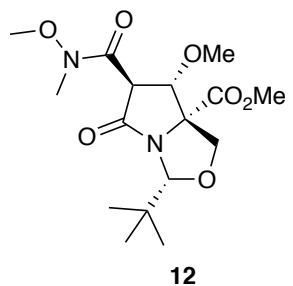

96.2

84.5

74.7

73.7

62.1

59.1

54.8

52.9

36.2

32.4

25.0

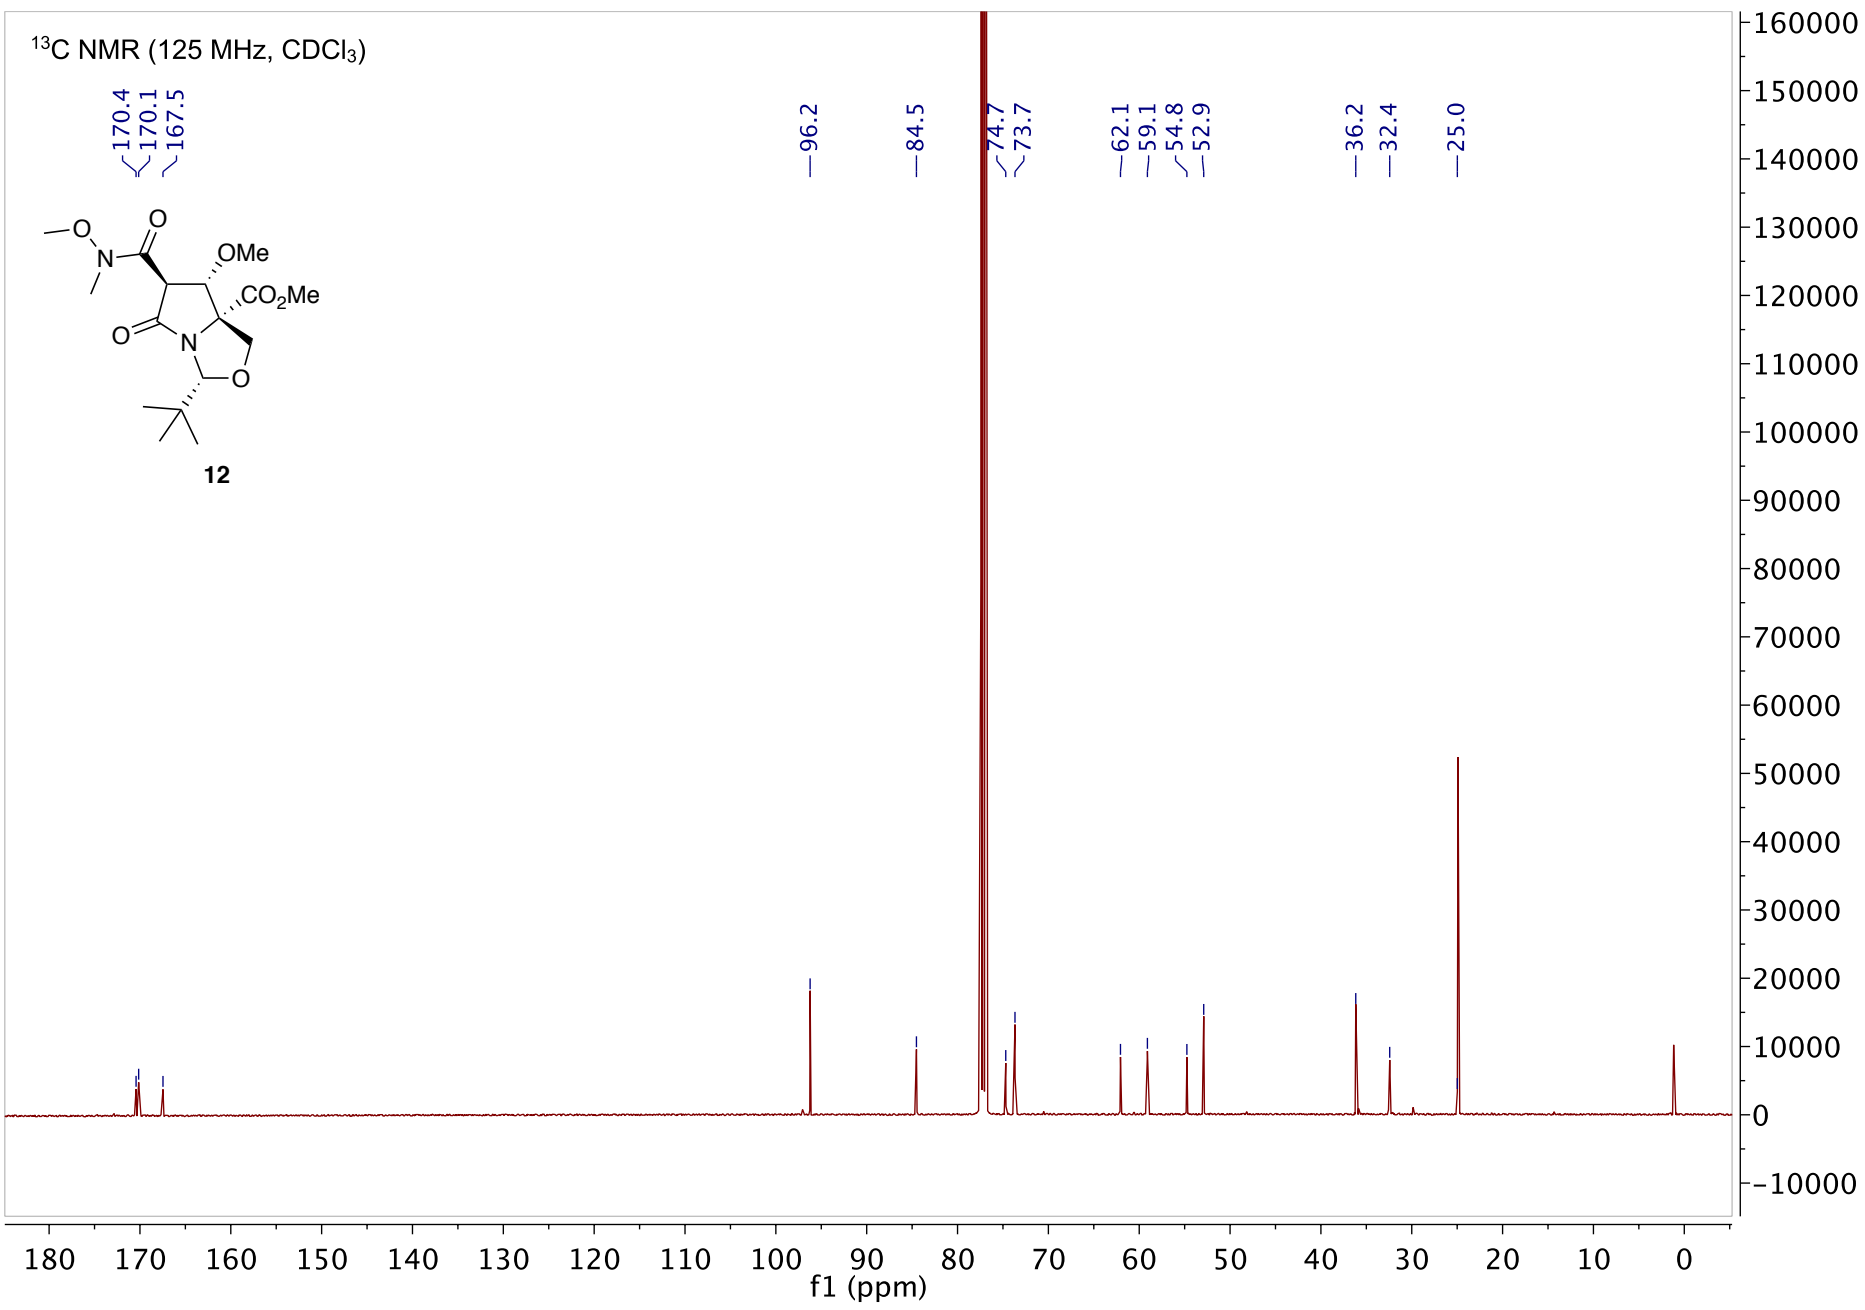

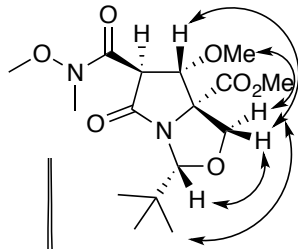

AVB500 1H TFI probe LAIA JOSA CULLERE 44955 PC: DMRZAR09 MGM 13/6/16 gradient NOE Tmix = 800msec

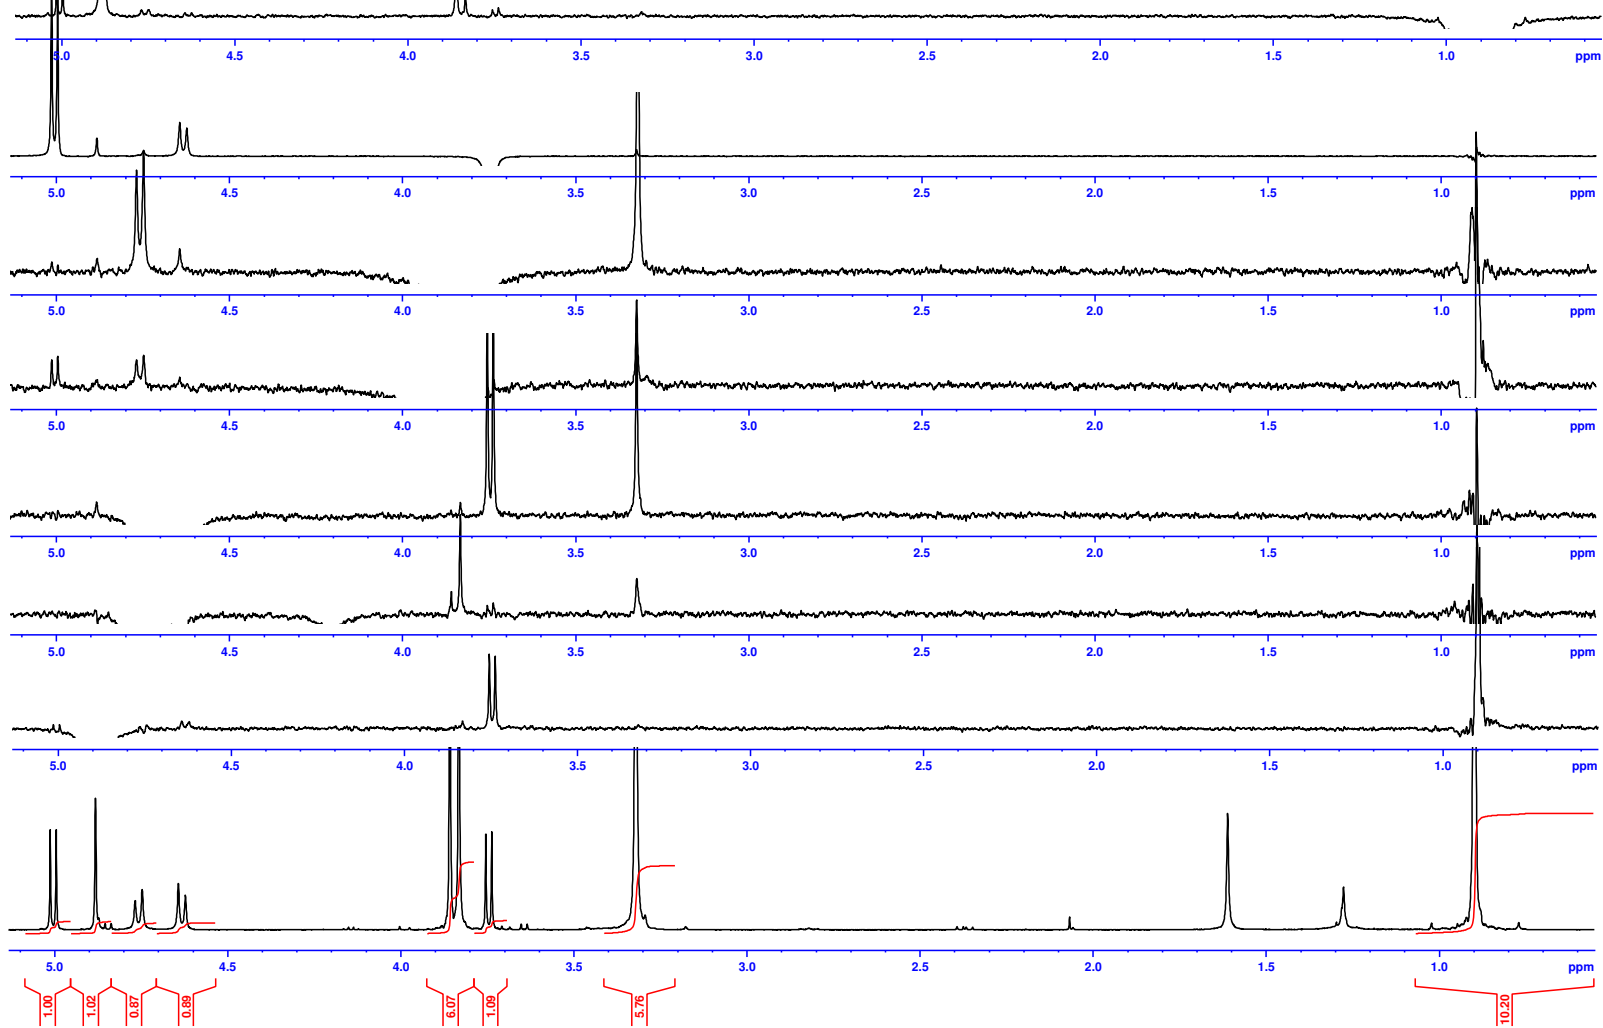

<sup>1</sup>H NMR (400 MHz, CDCl<sub>3</sub>)

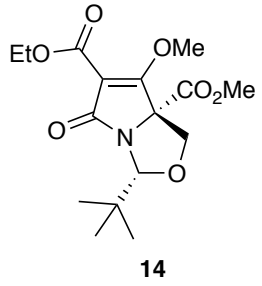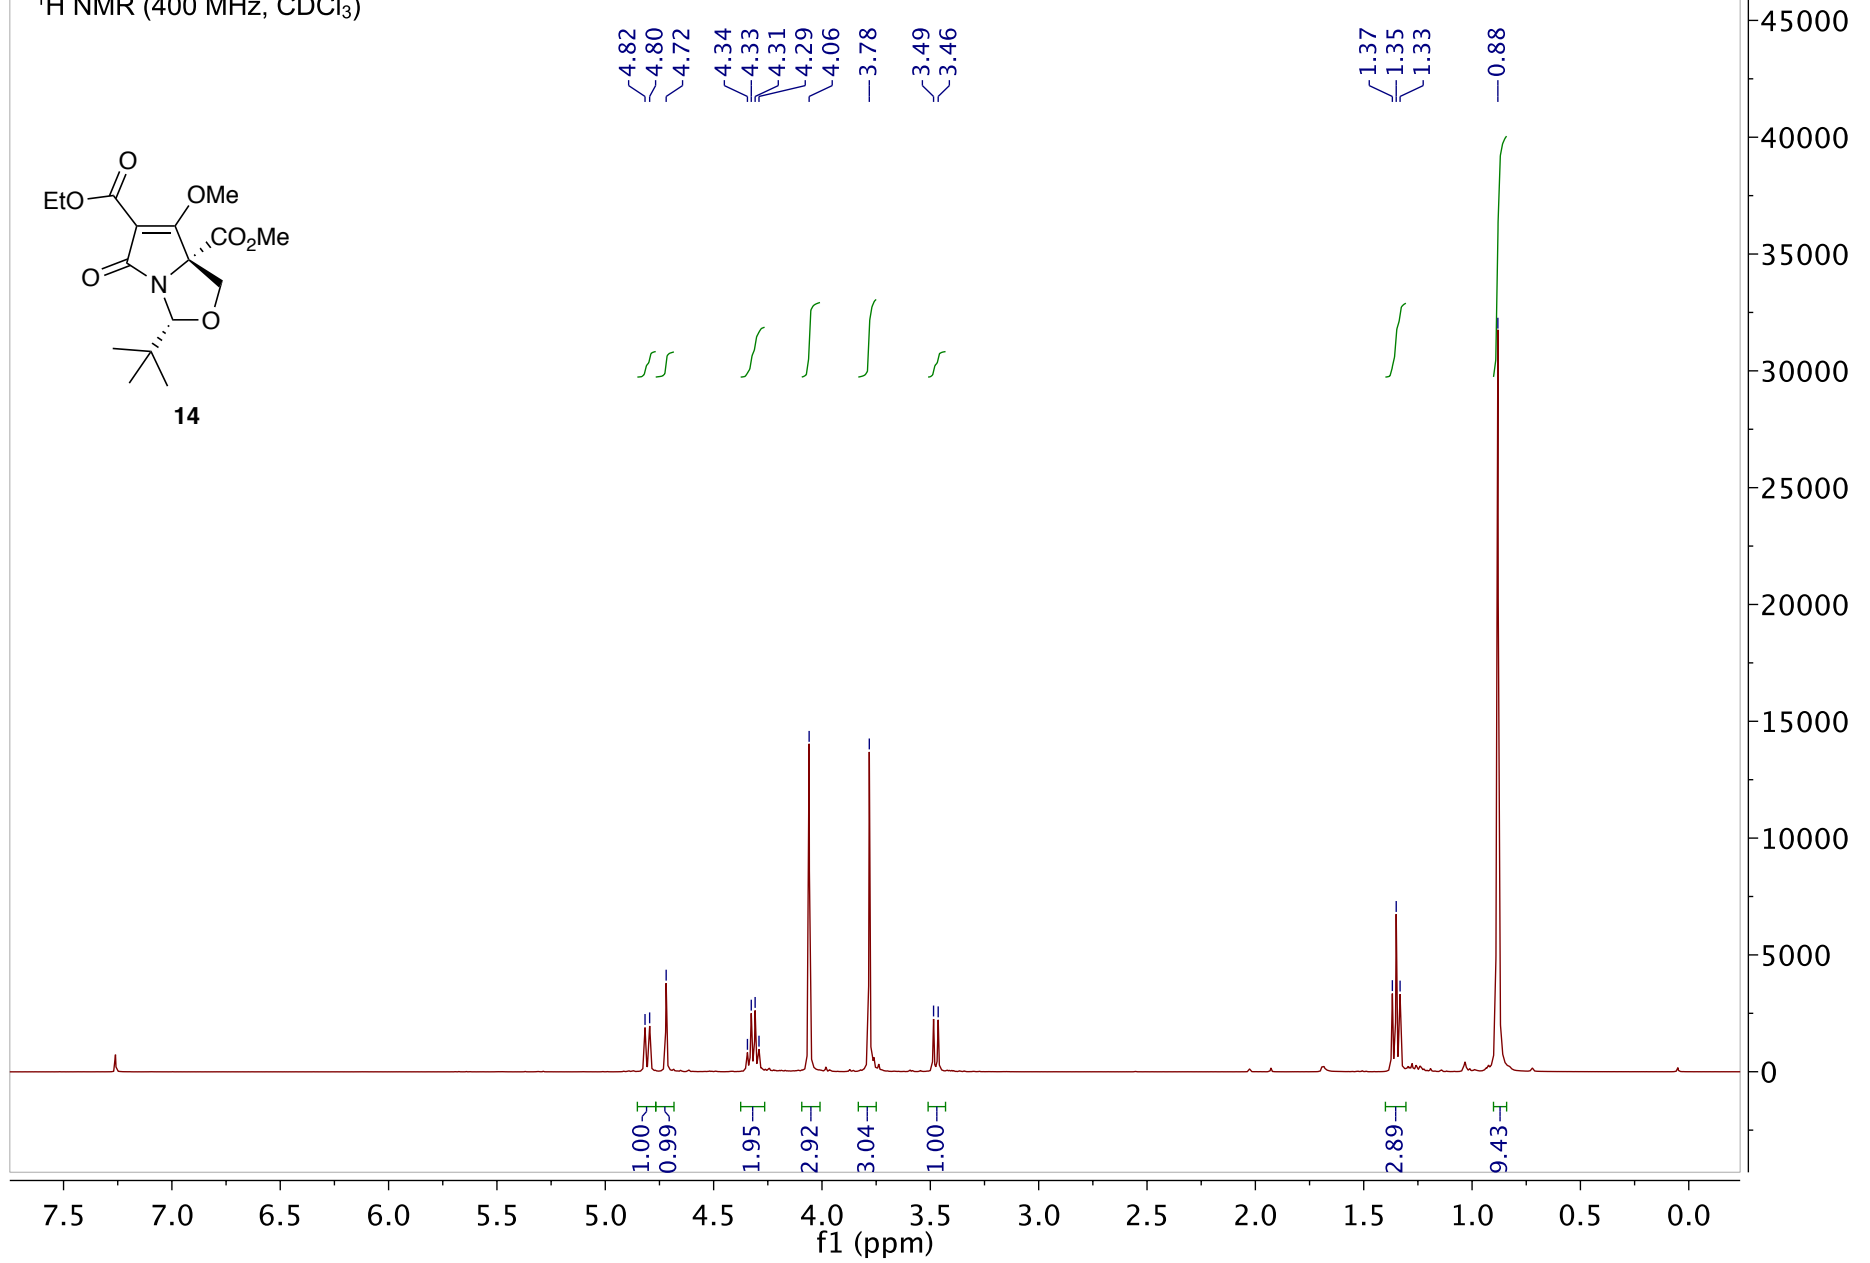

<sup>13</sup>C NMR (100 MHz, CDCl<sub>3</sub>)

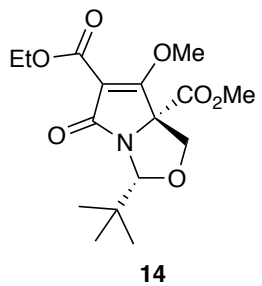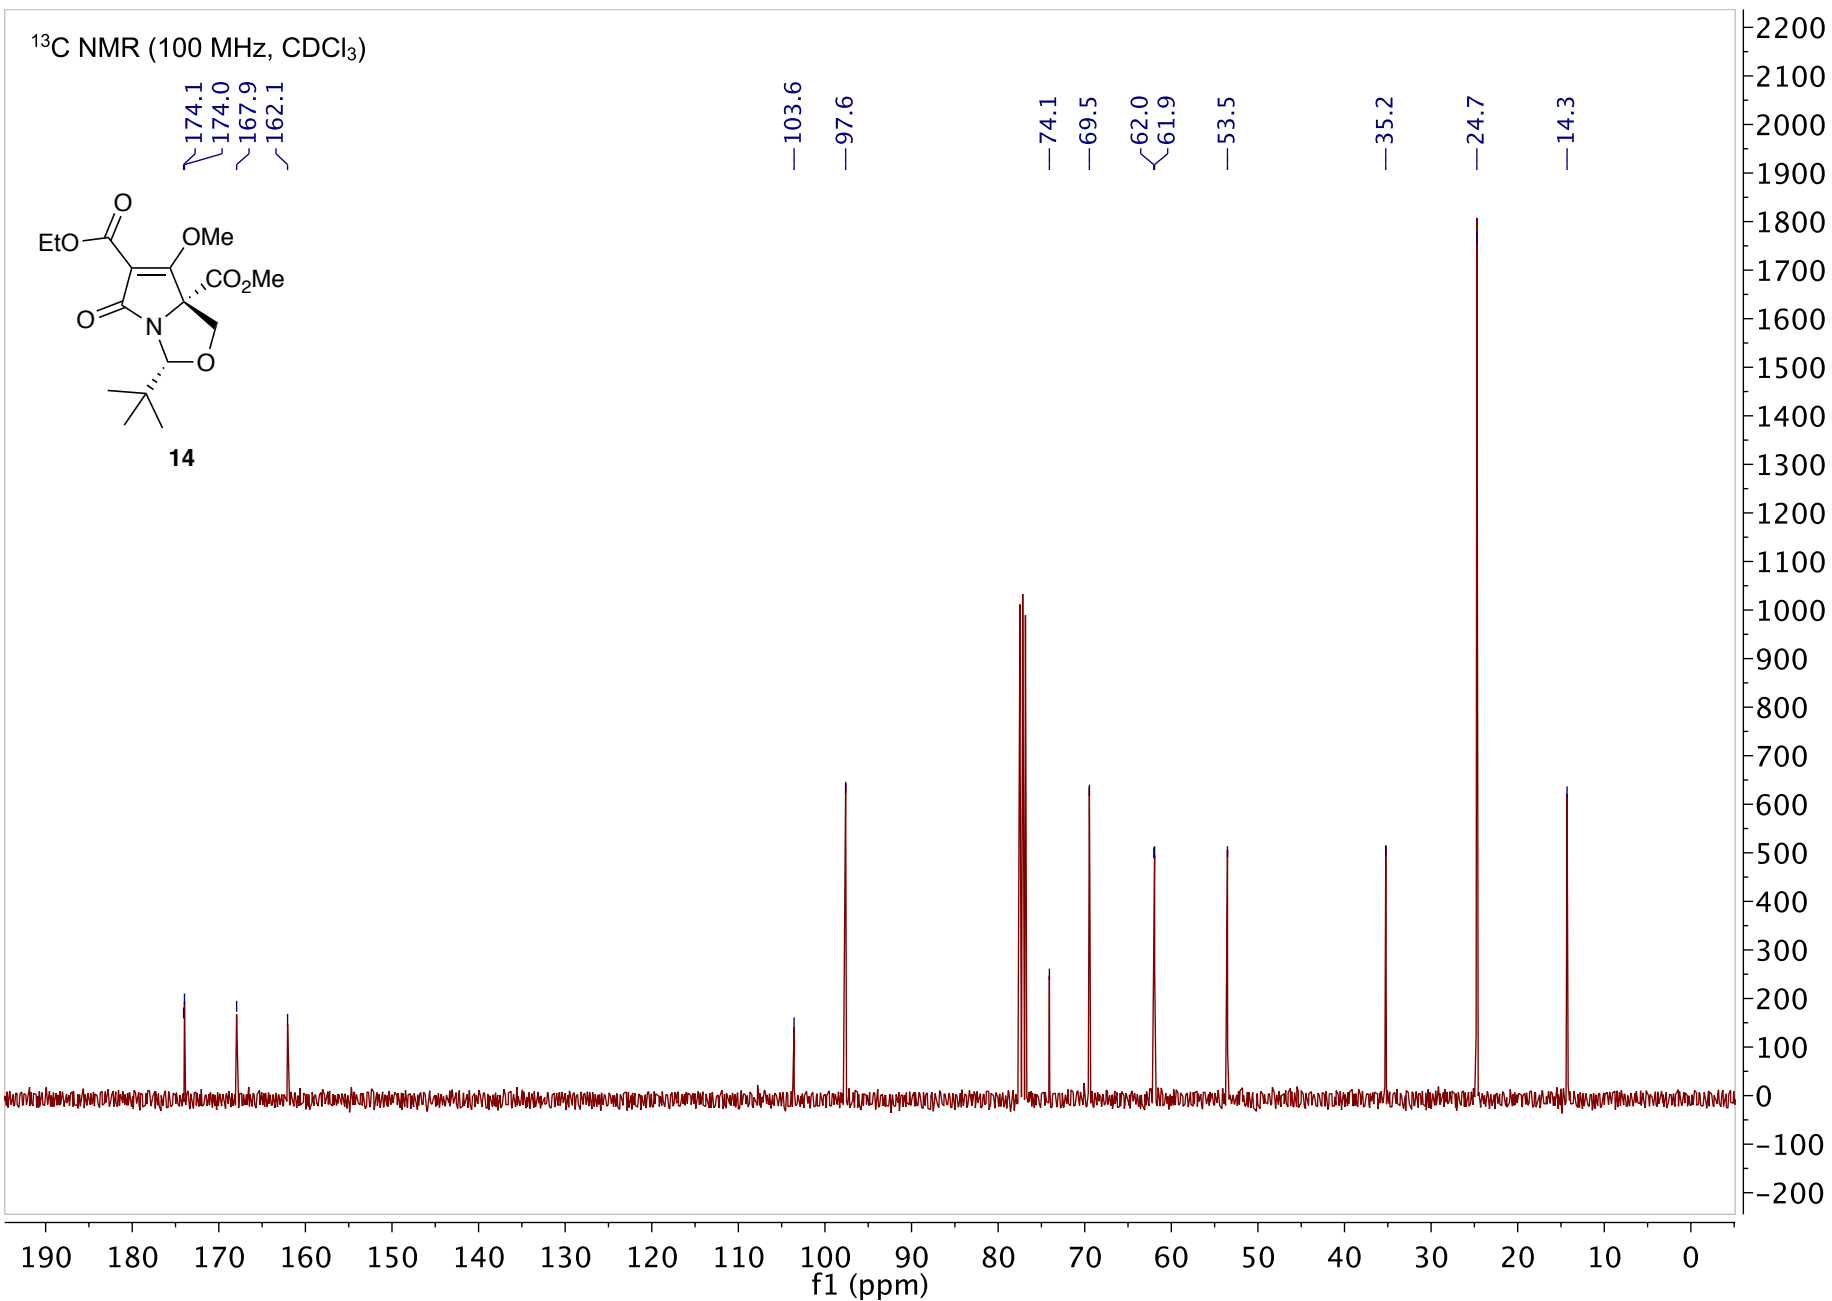



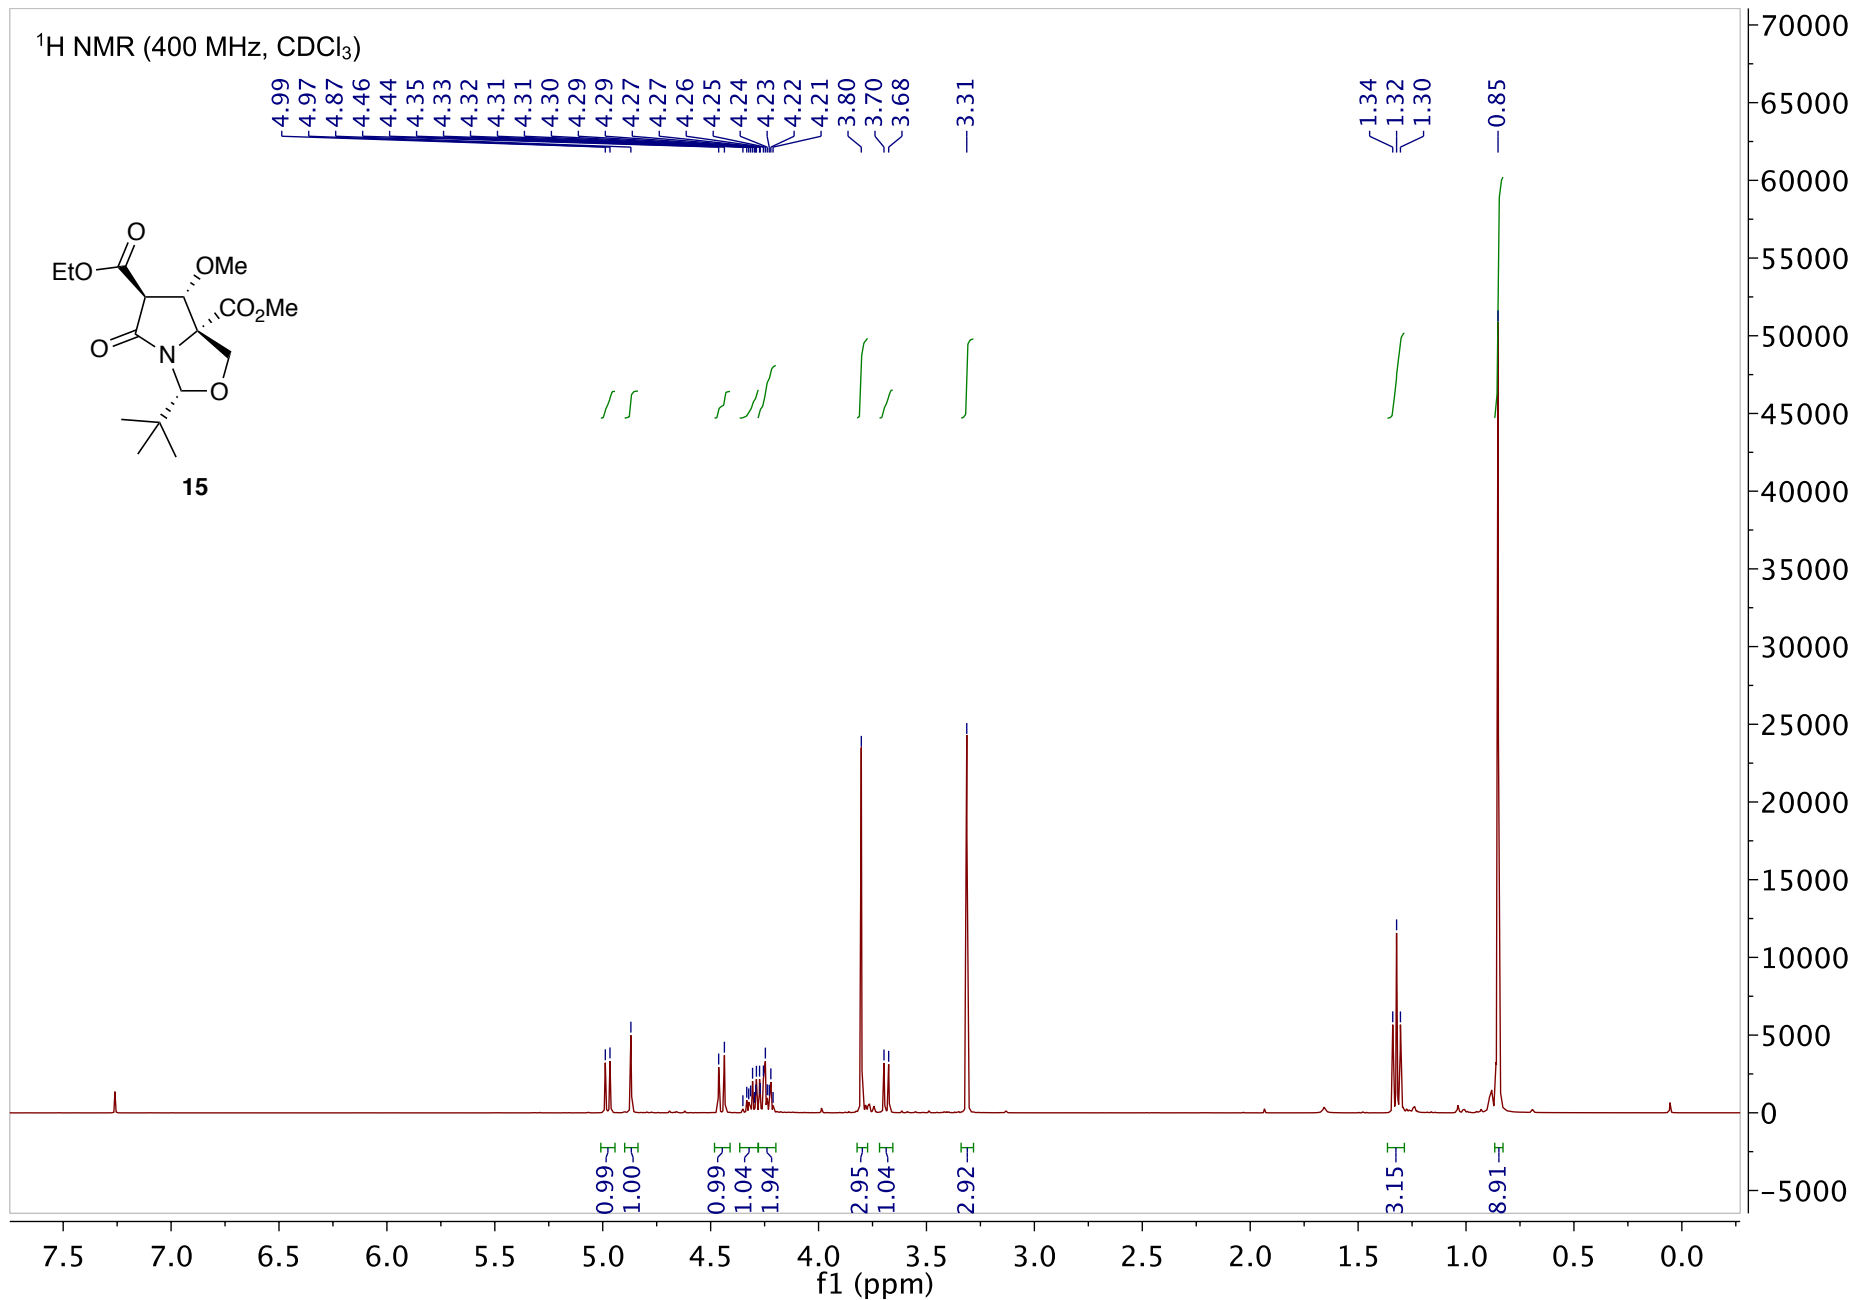

<sup>13</sup>C NMR (100 MHz, CDCl<sub>3</sub>)

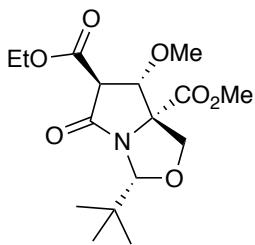

15

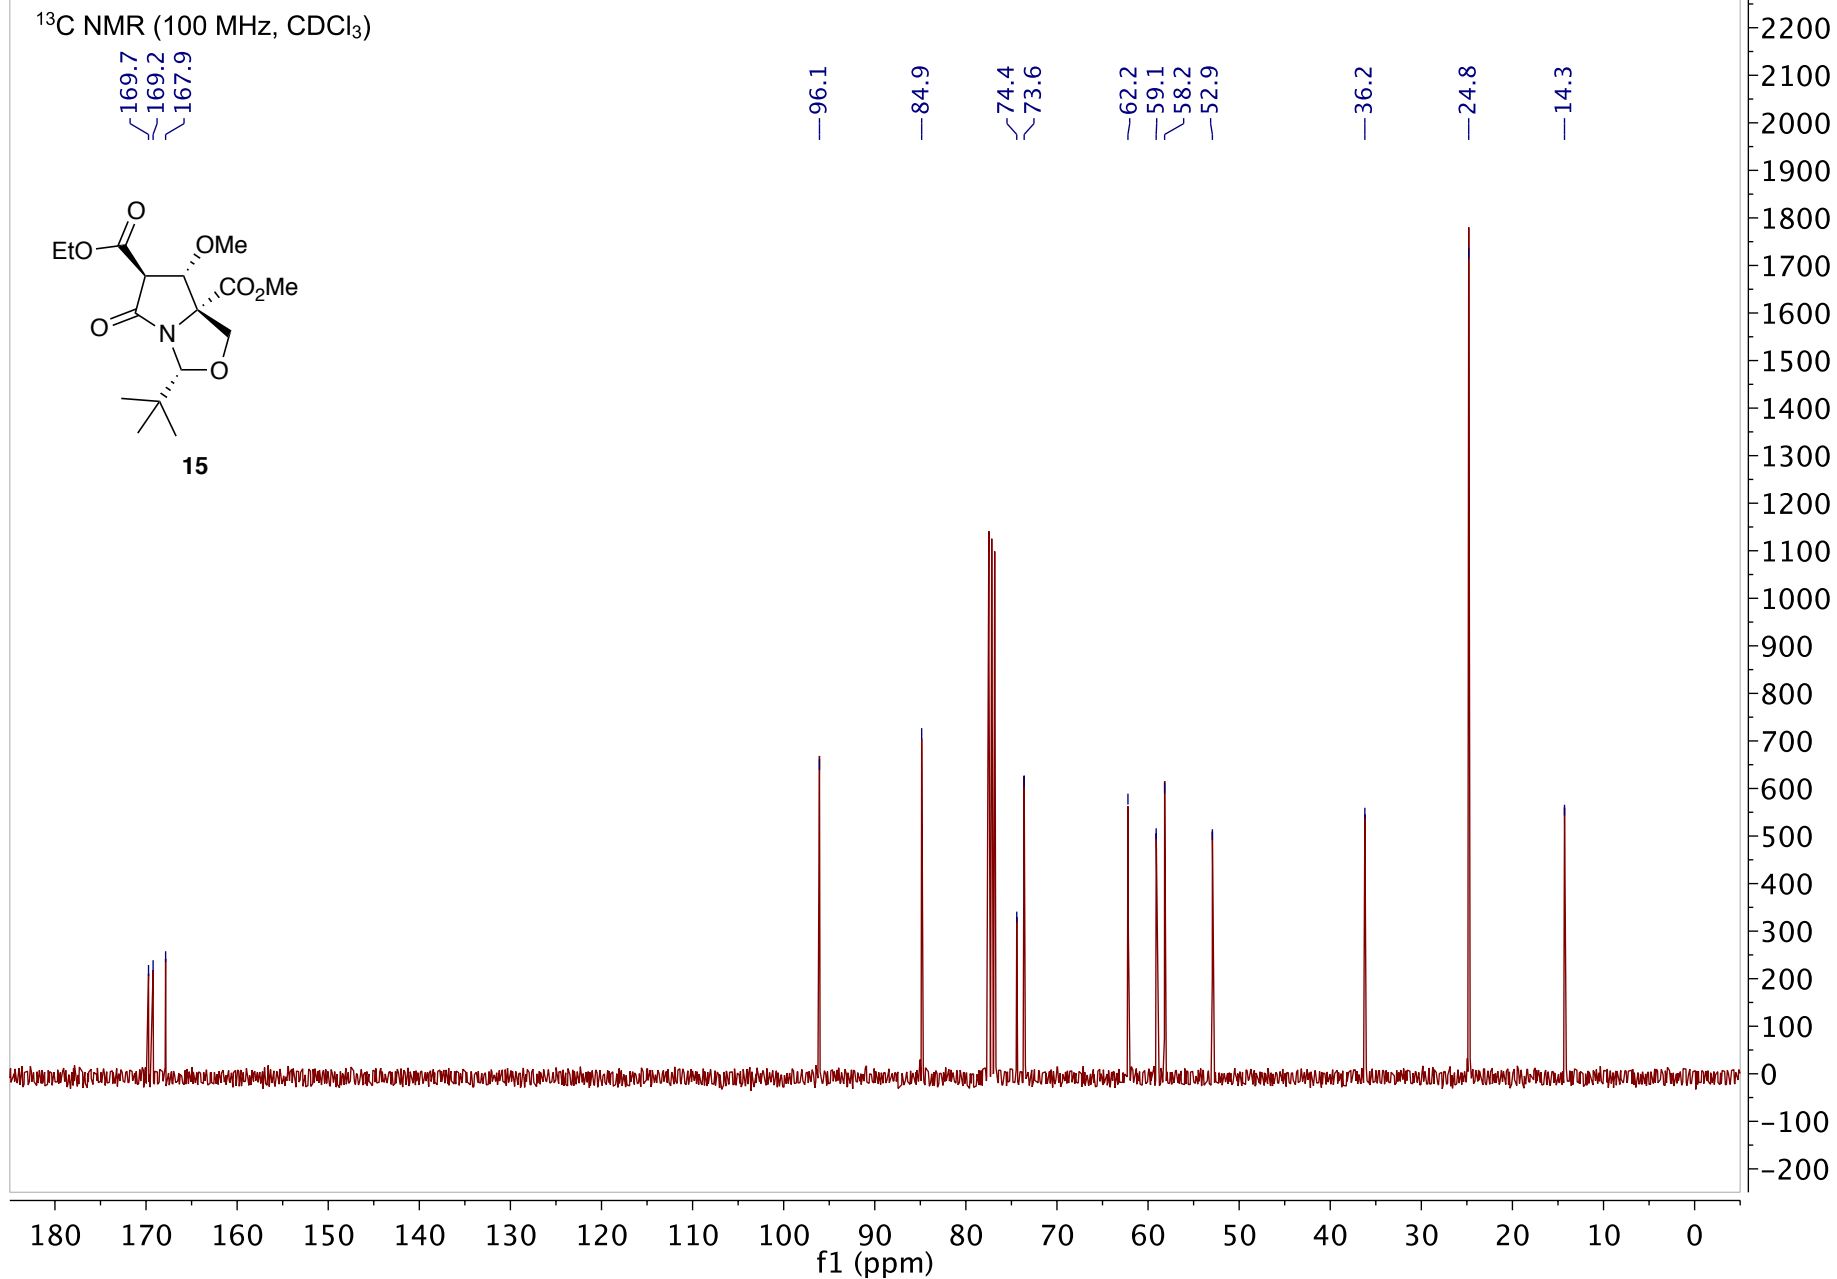

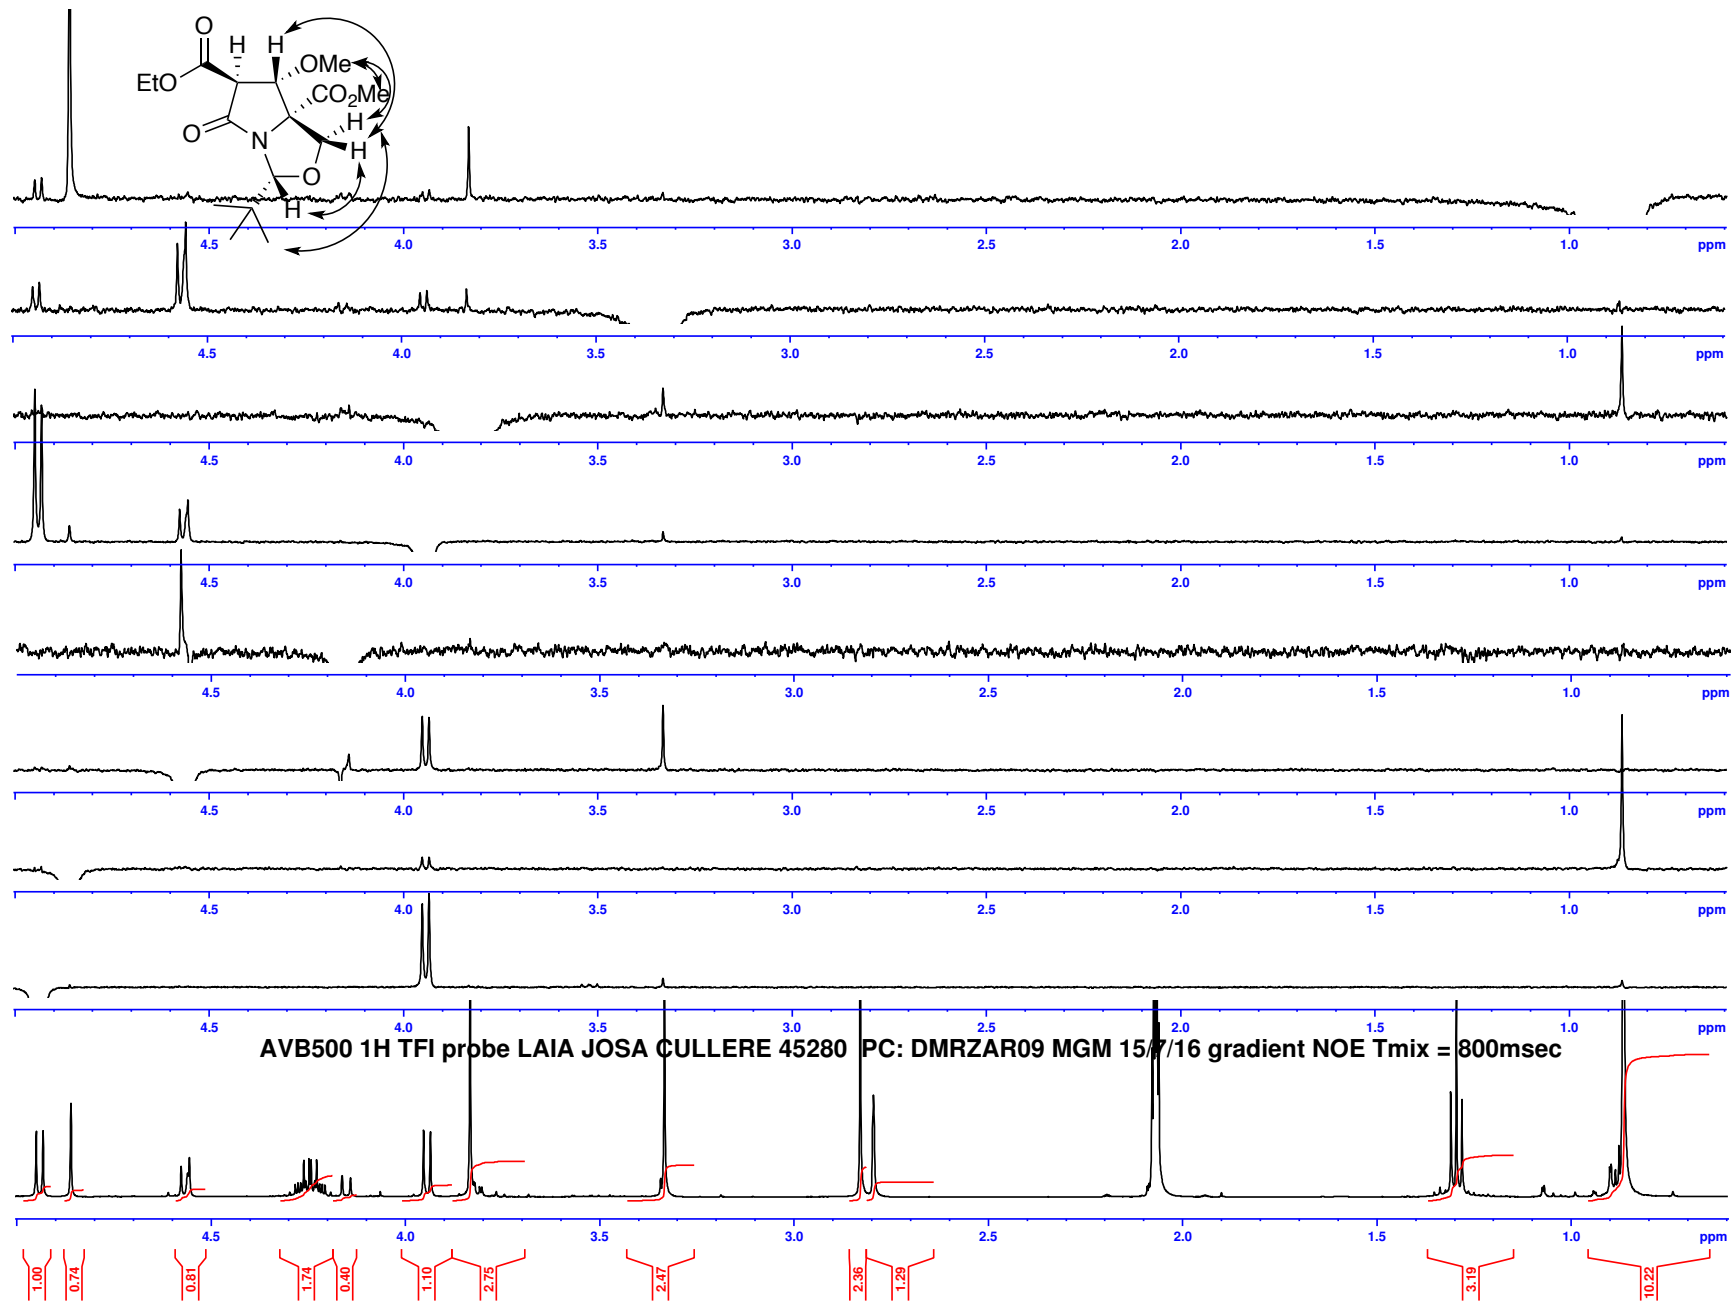

<sup>1</sup>H NMR (400 MHz, CDCl<sub>3</sub>)

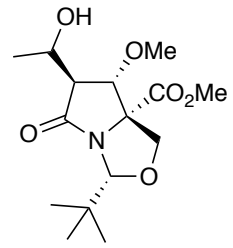

17

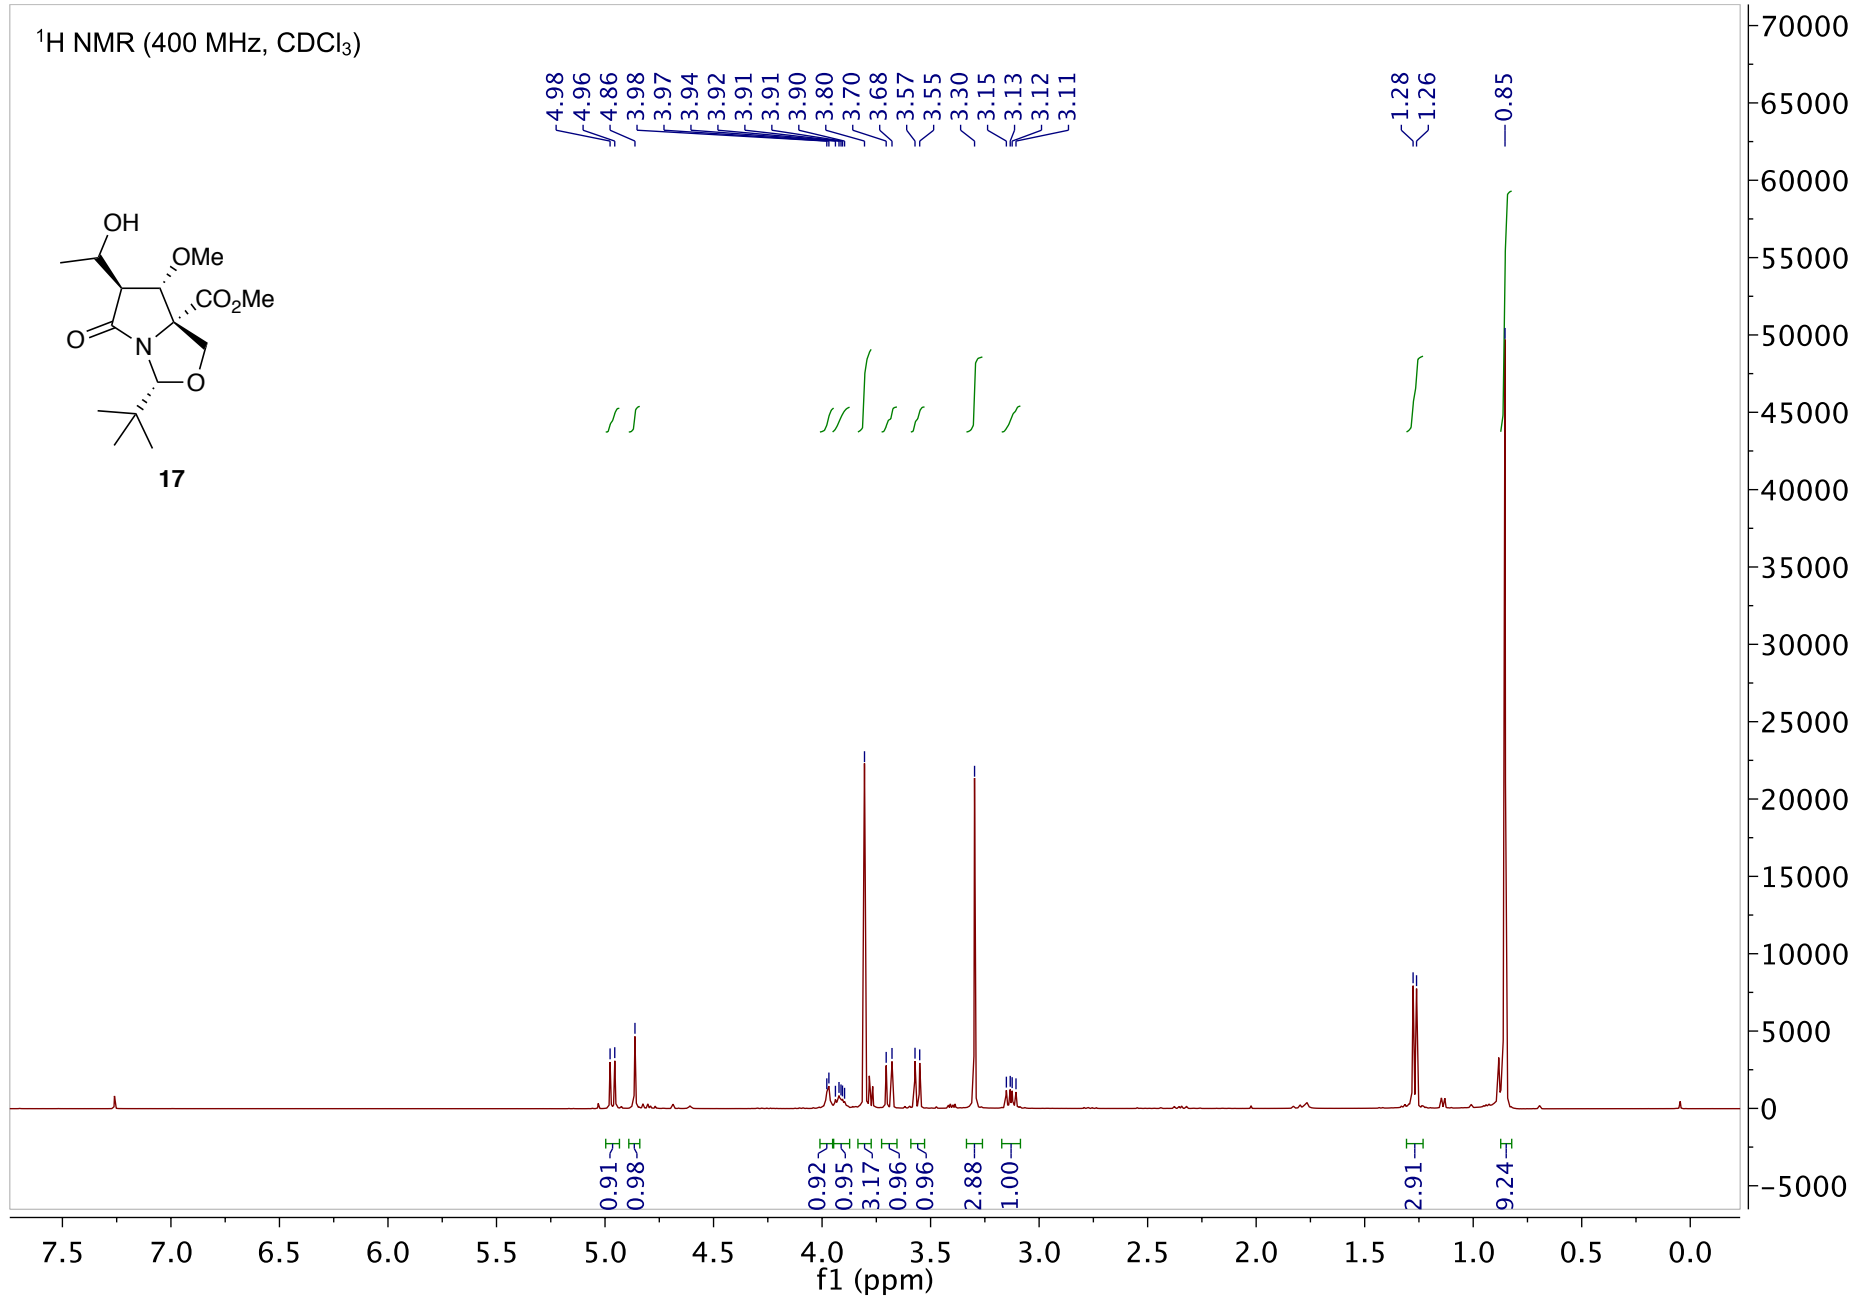

<sup>13</sup>C NMR (100 MHz, CDCl<sub>3</sub>)

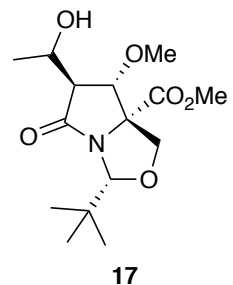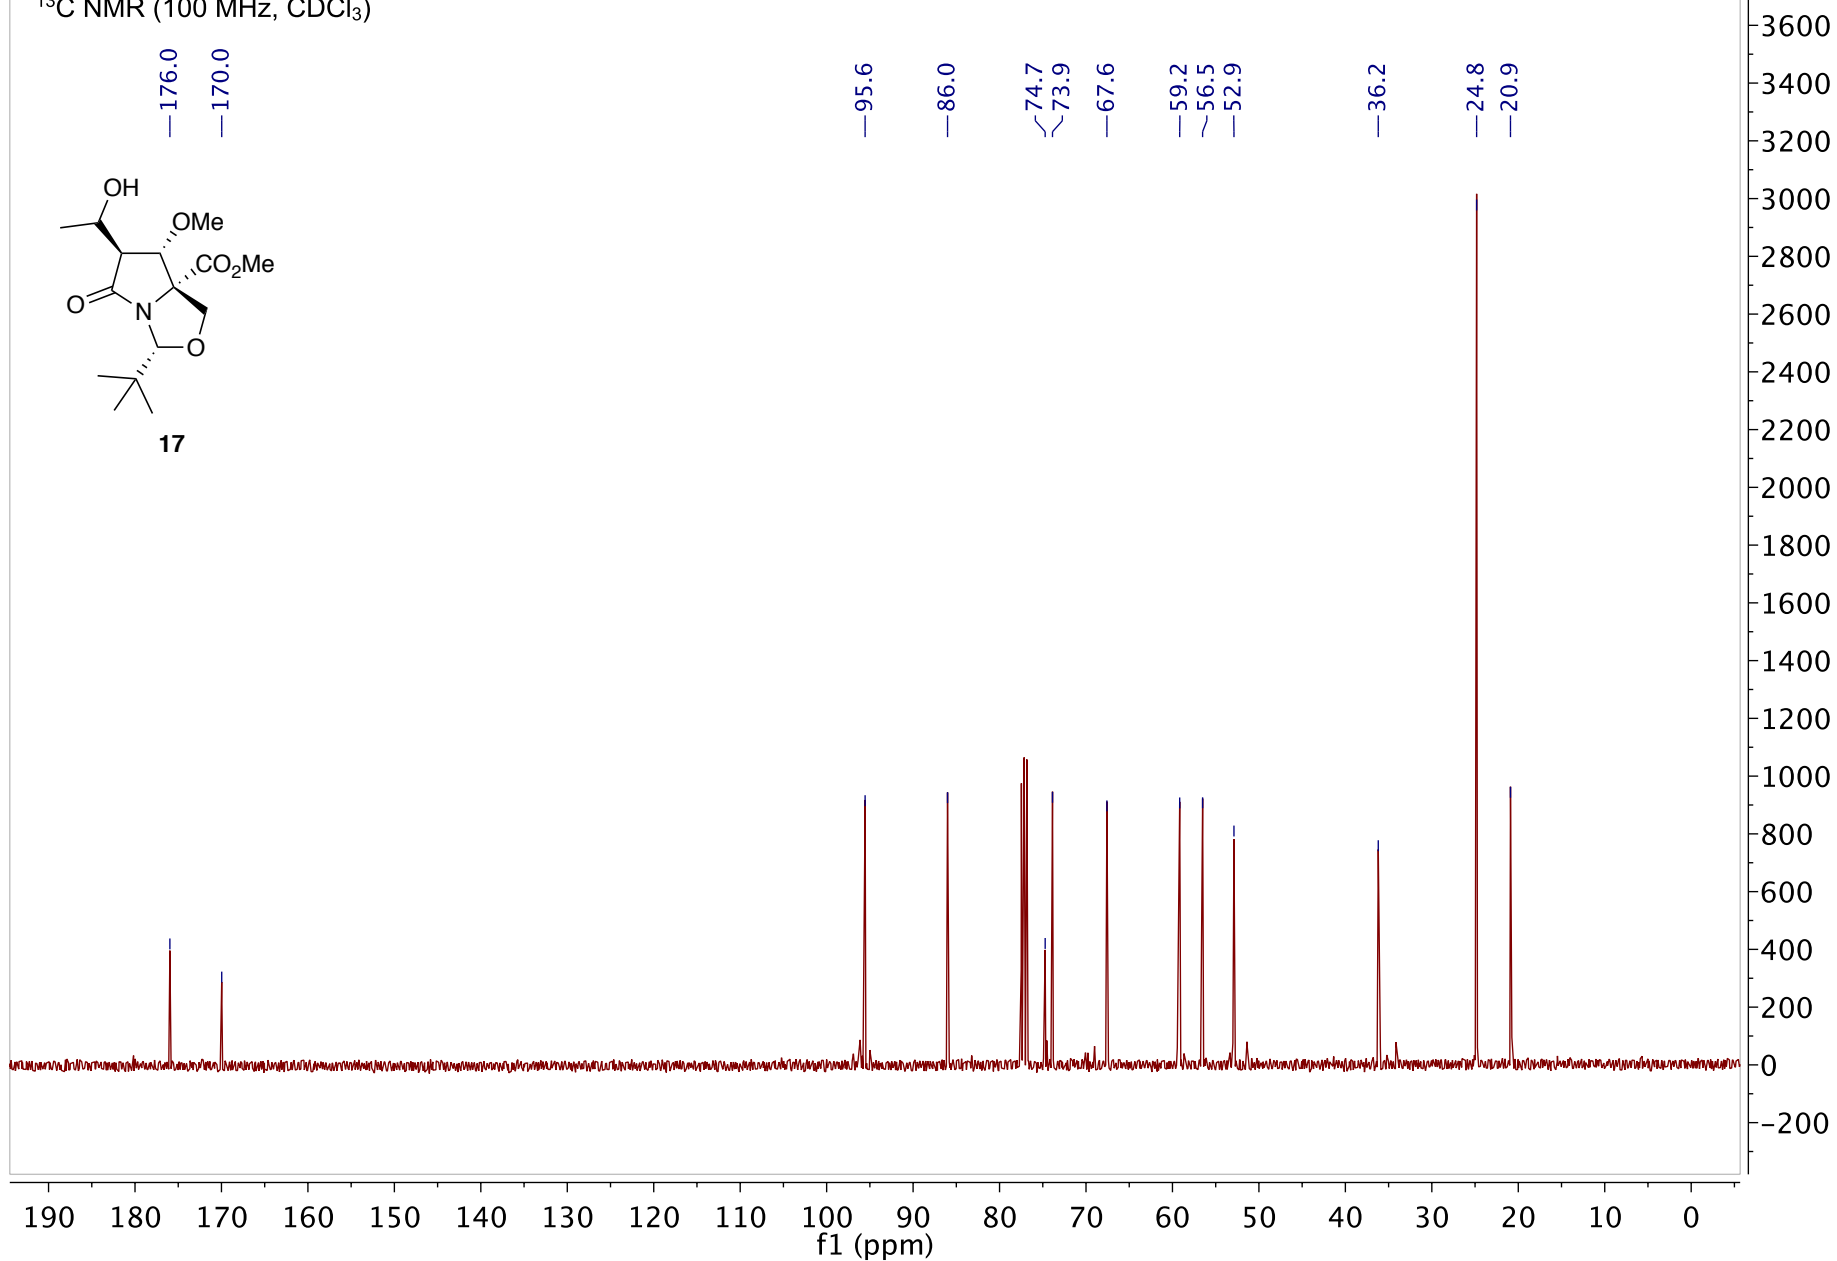

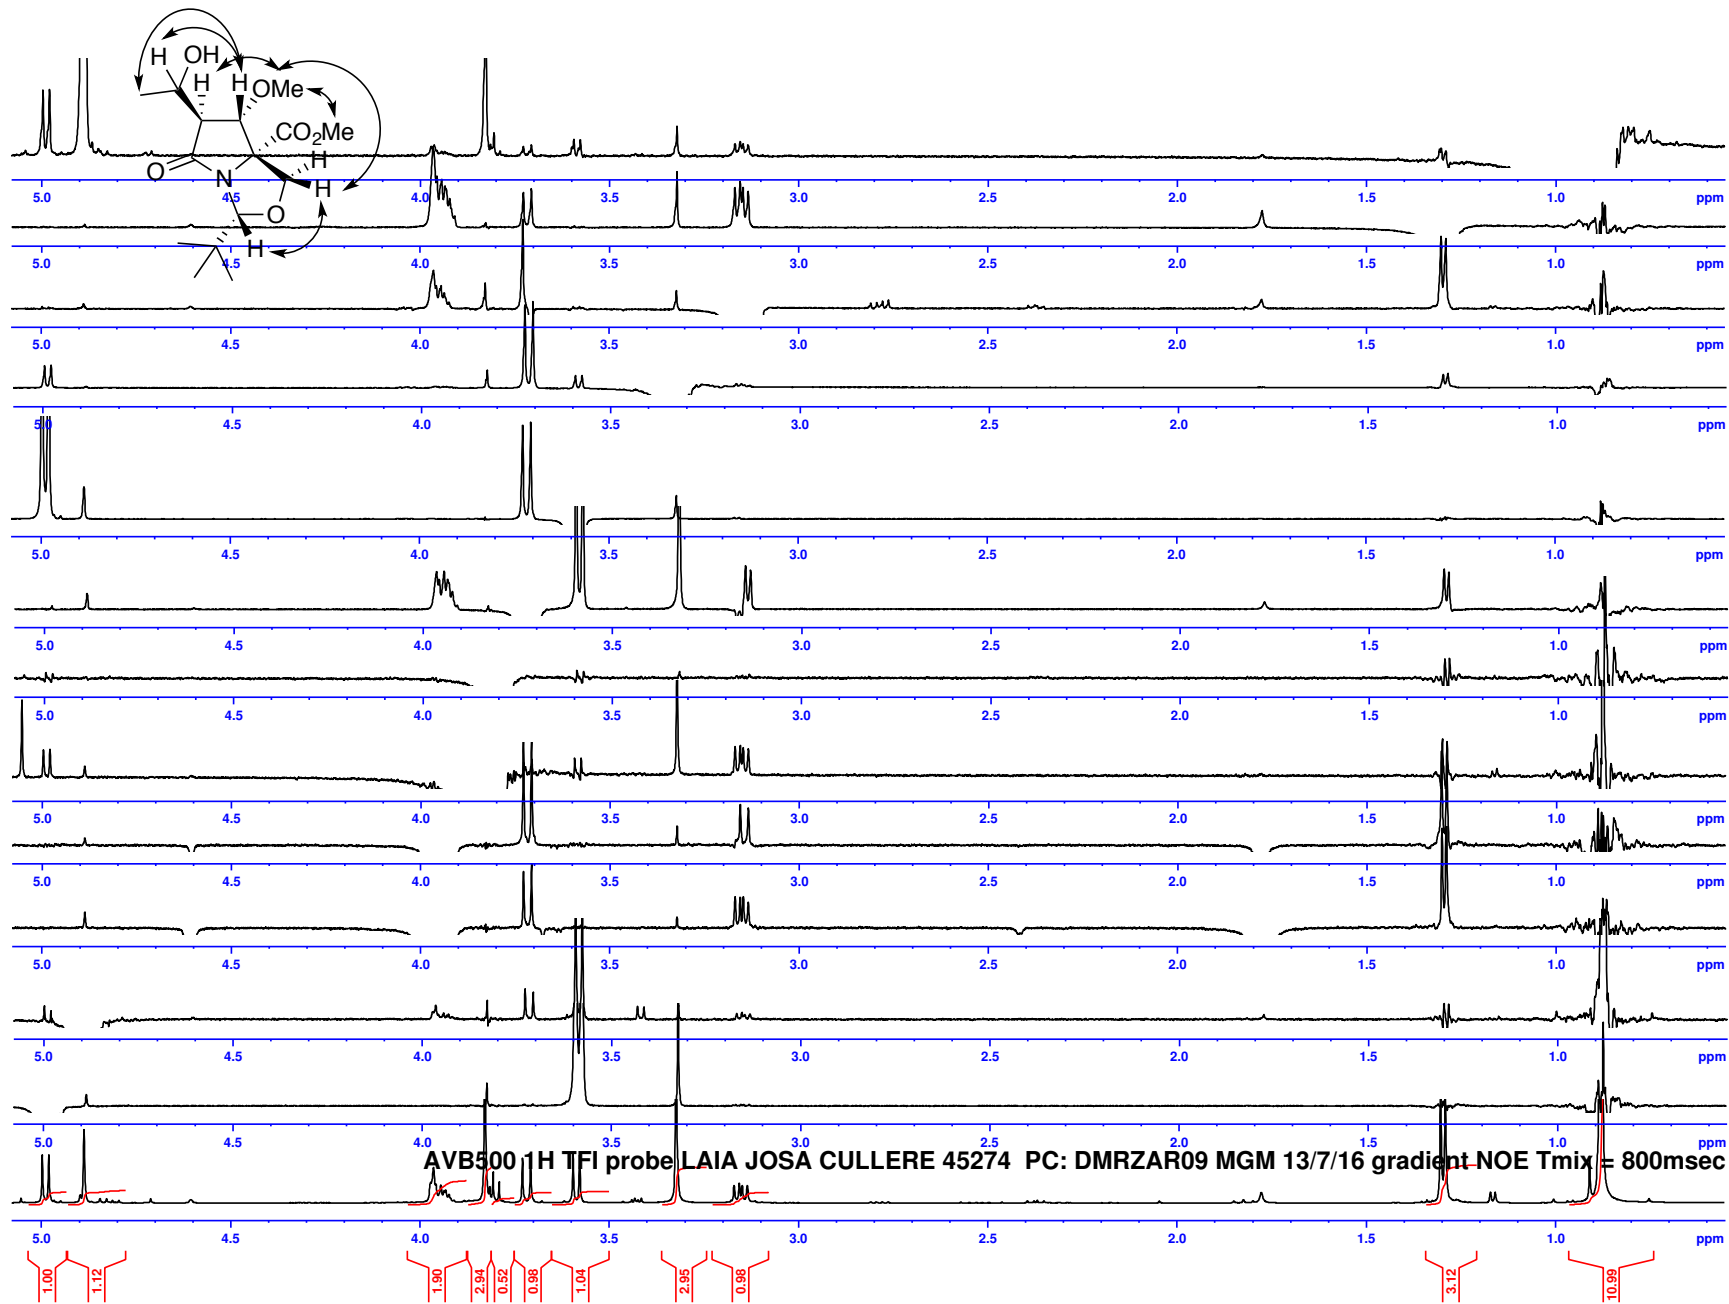

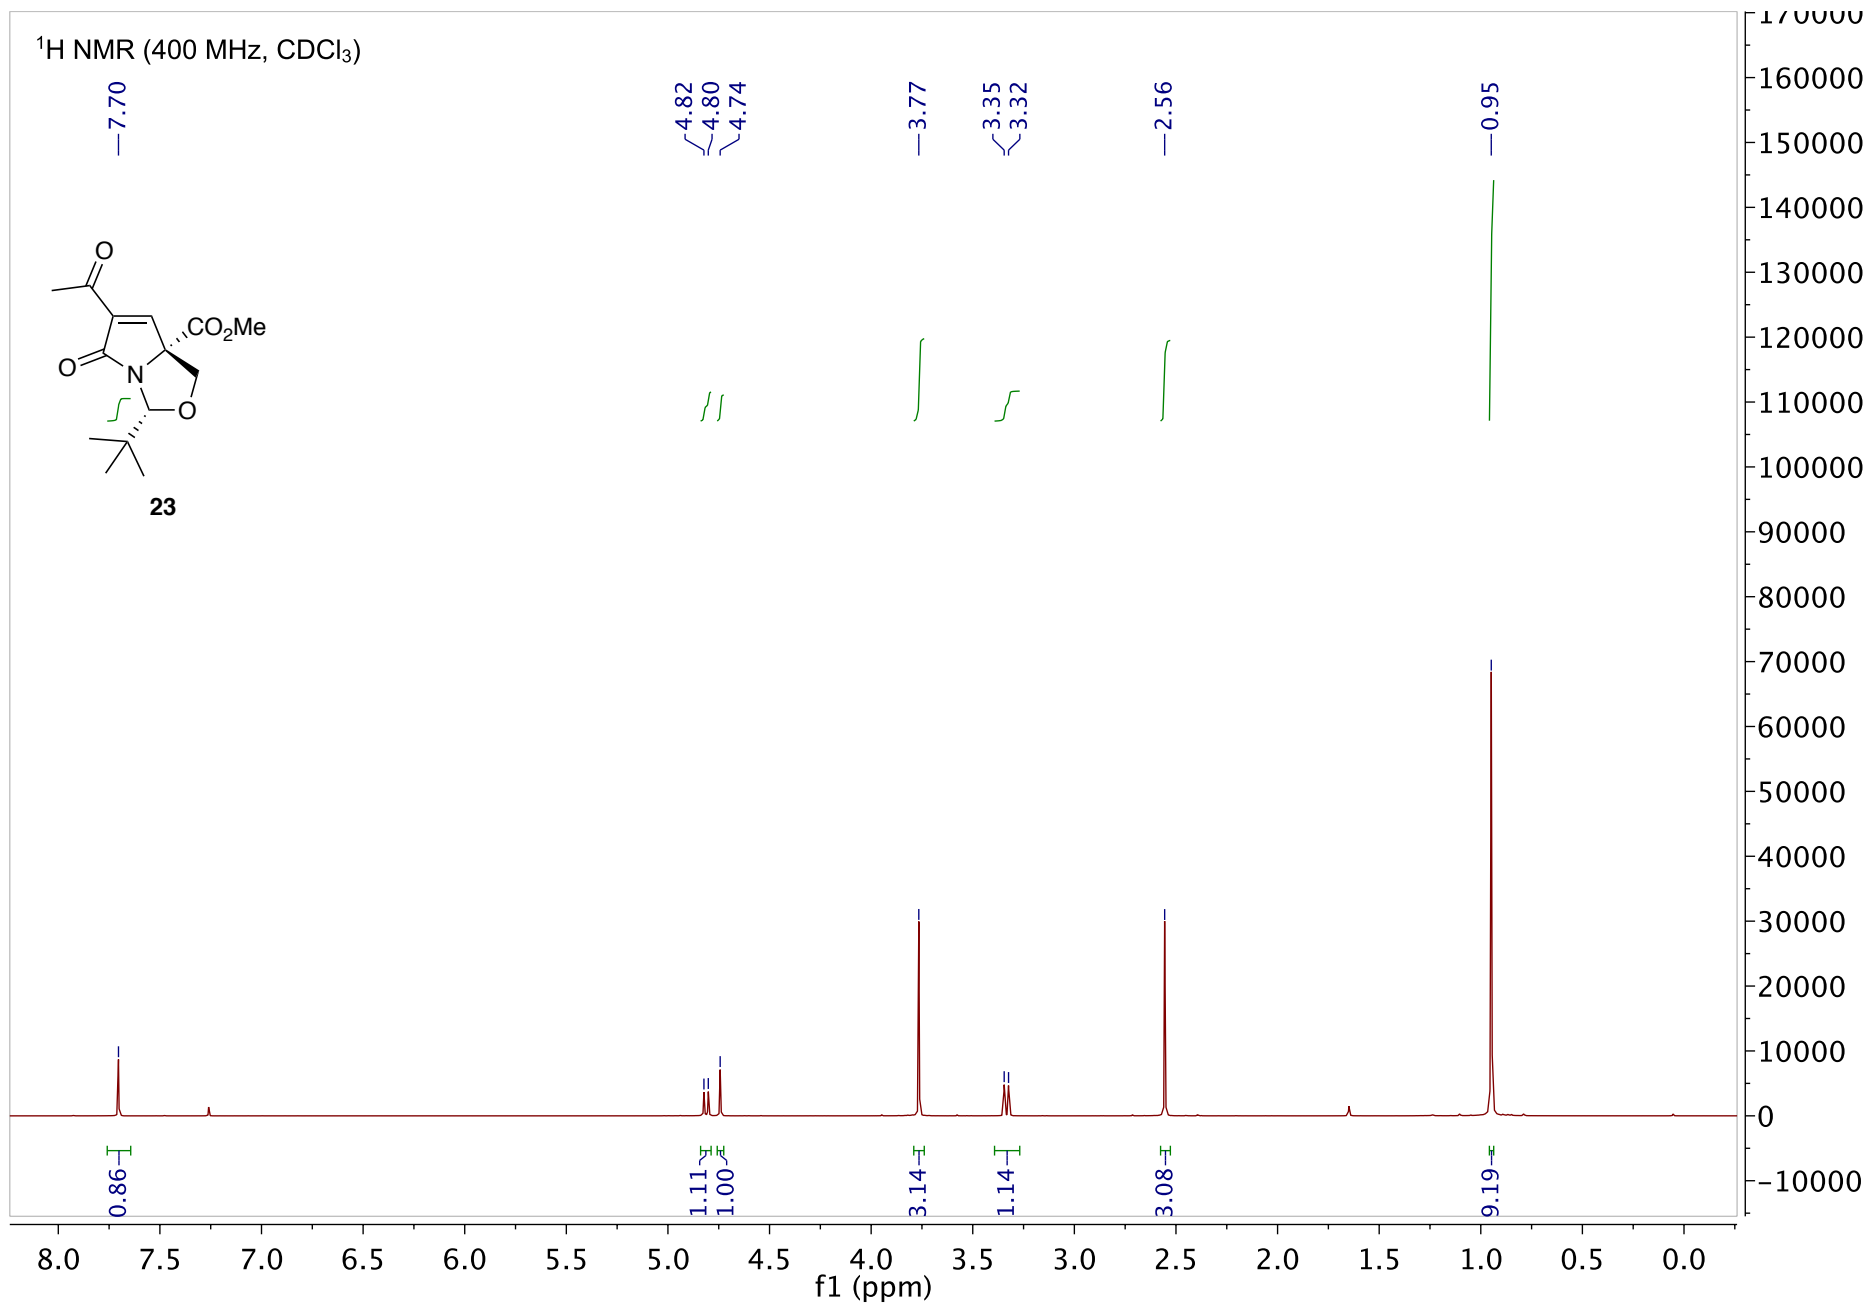

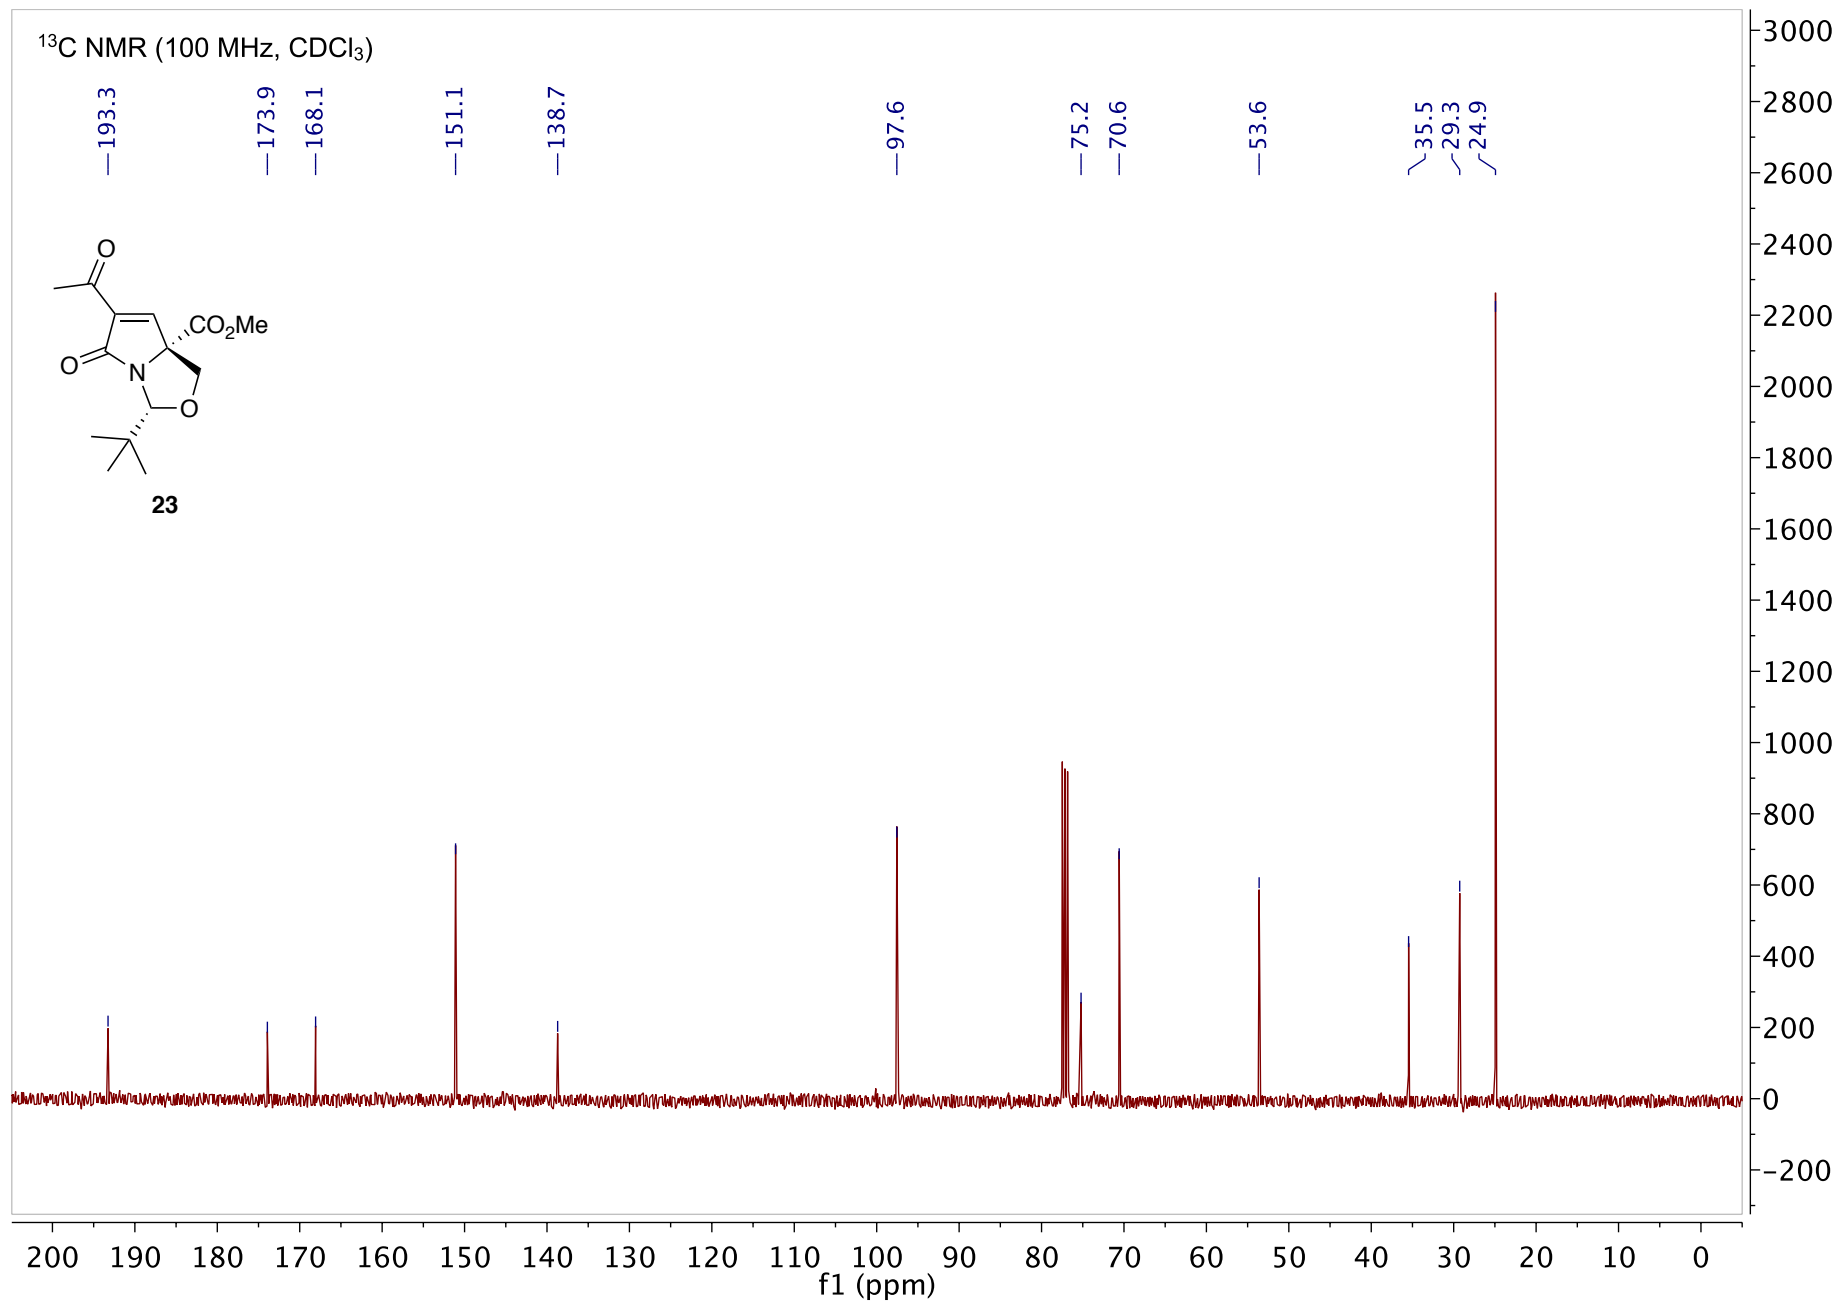



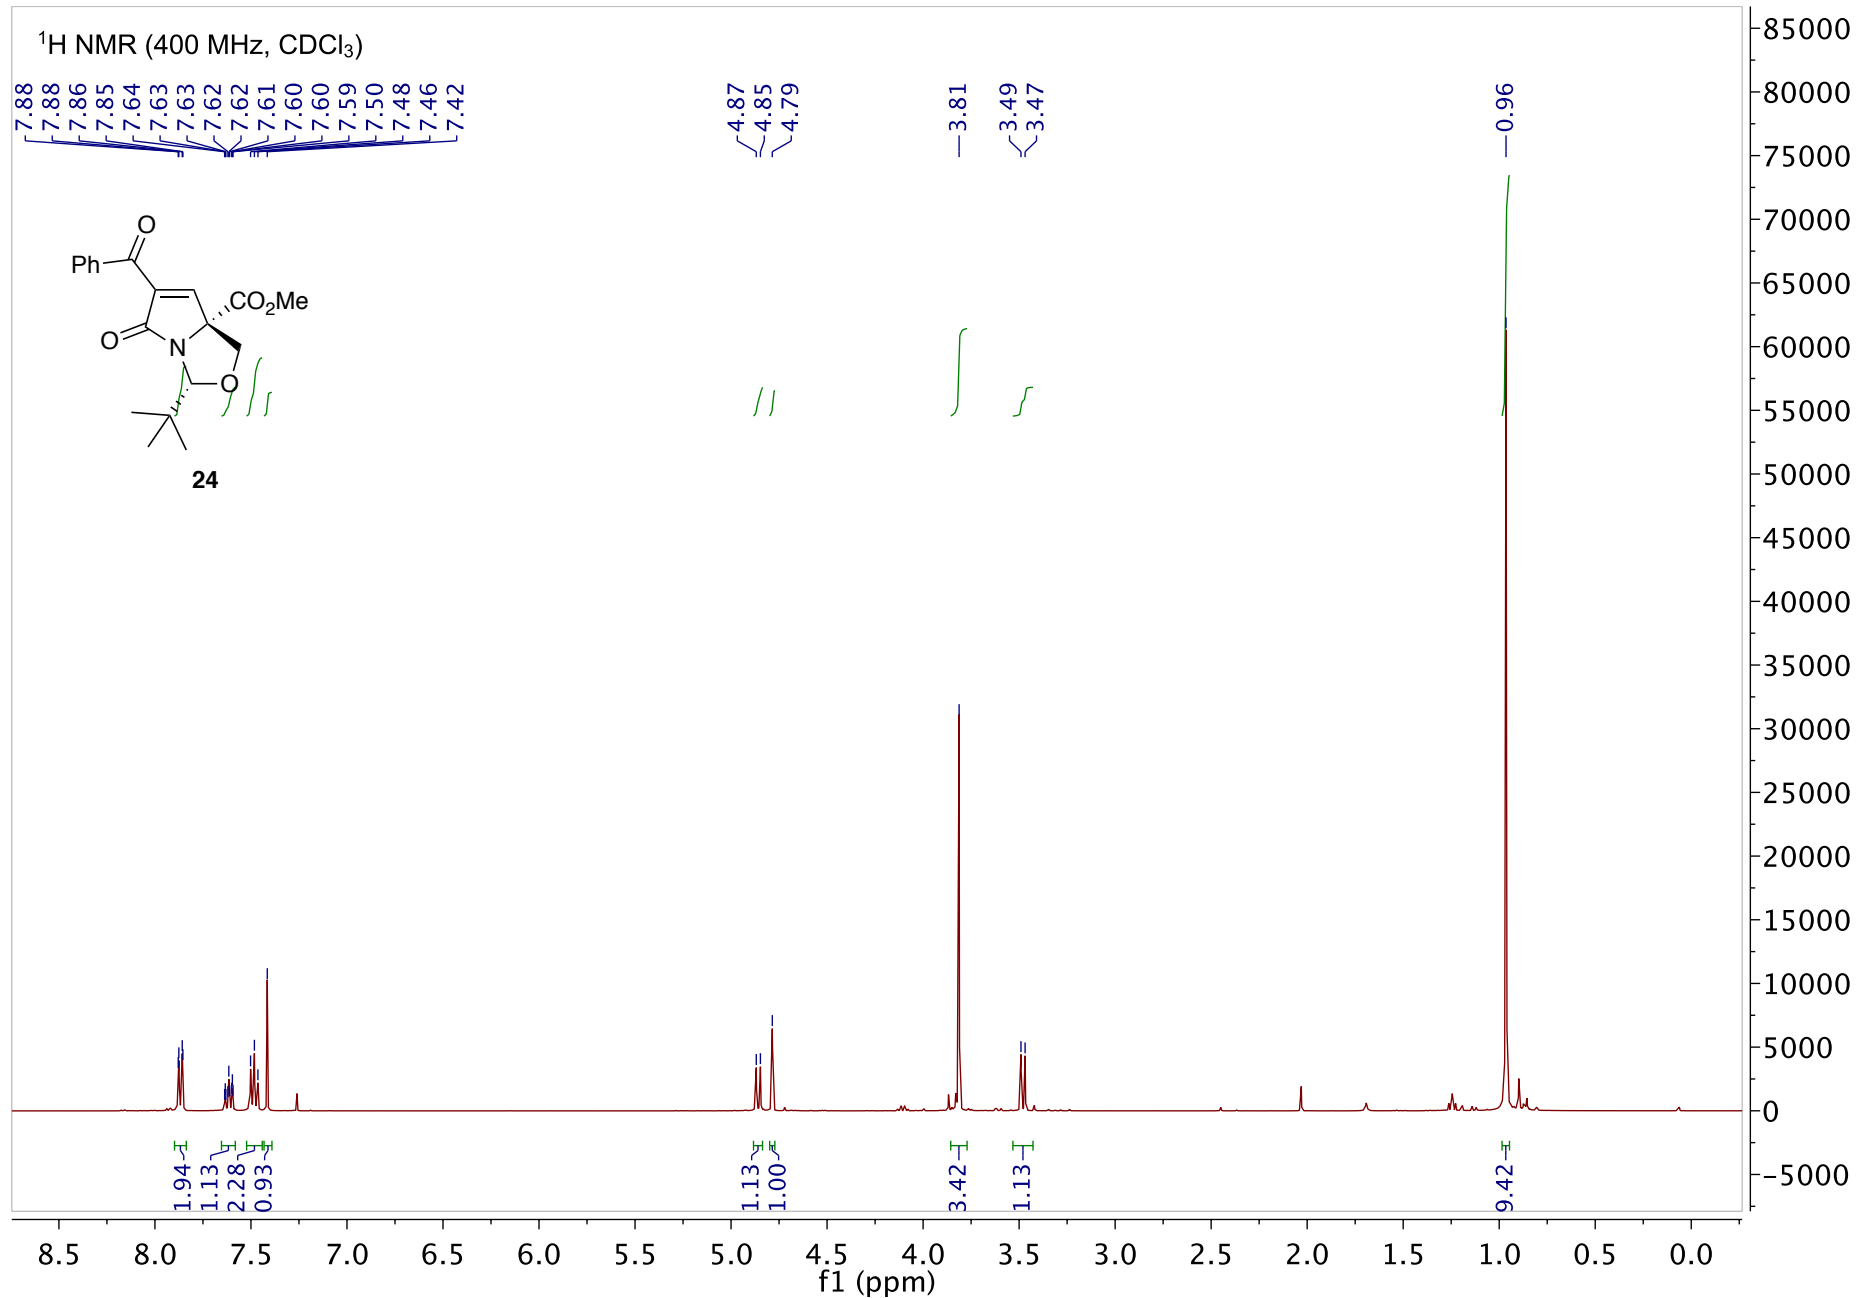

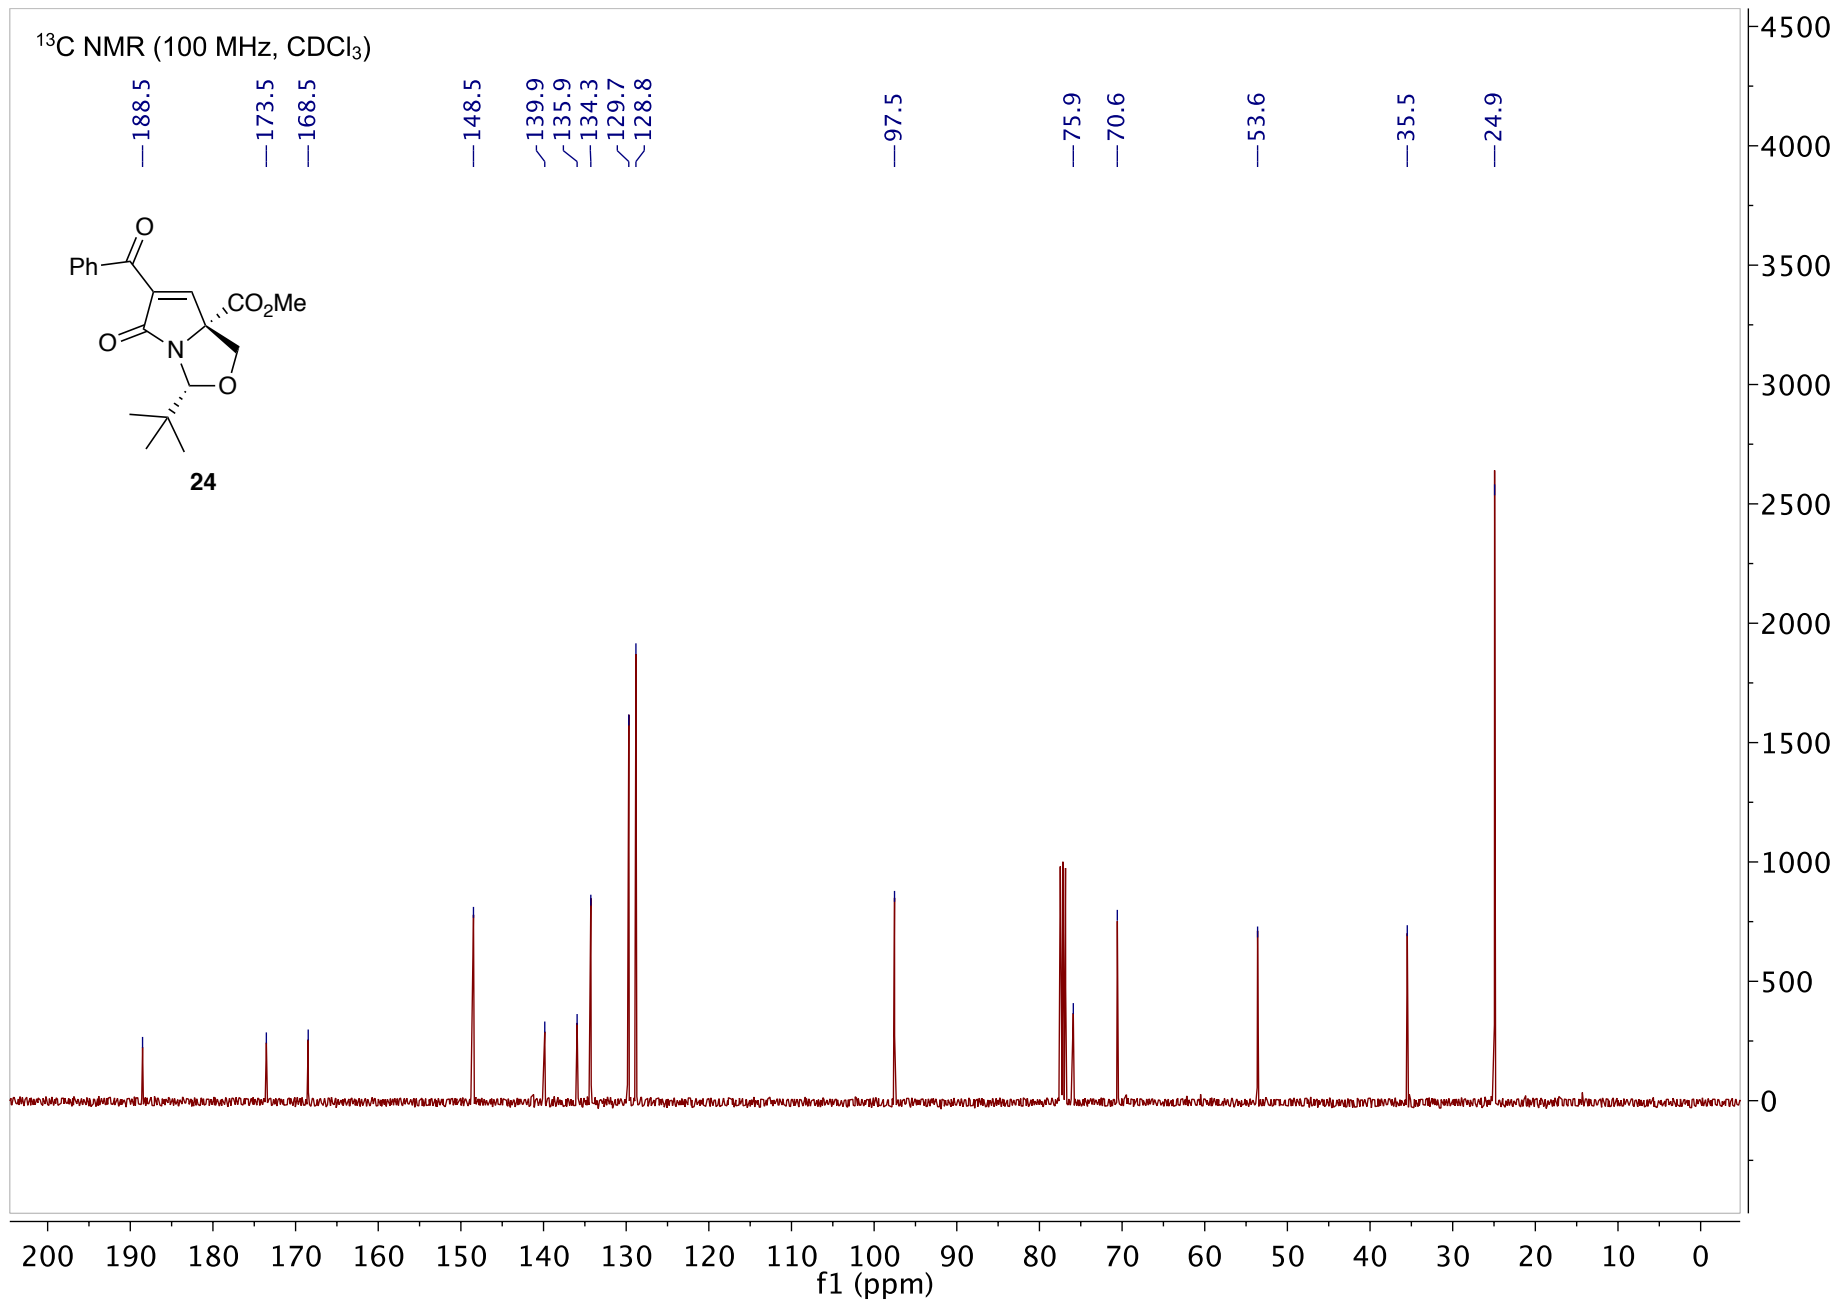

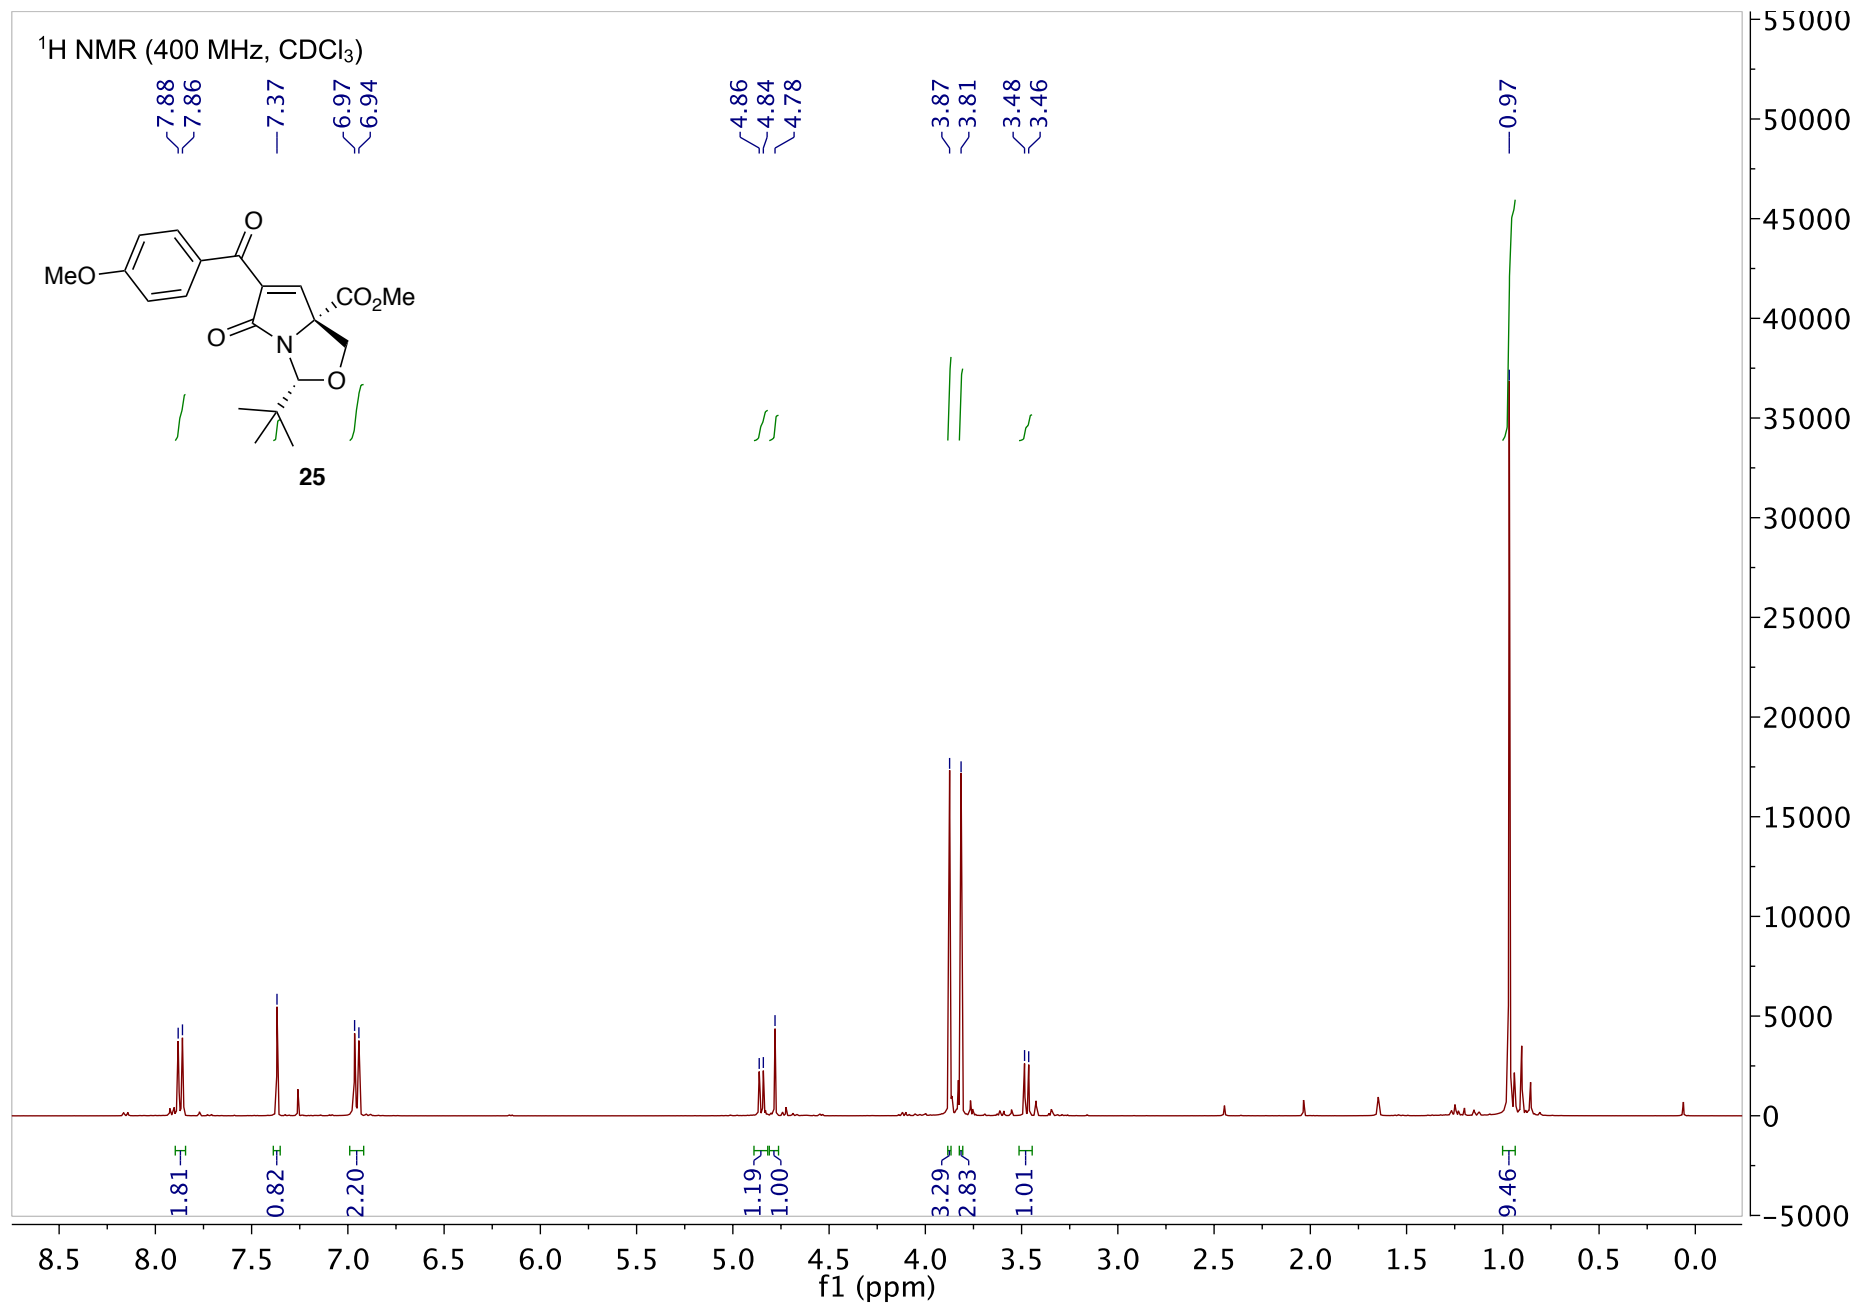

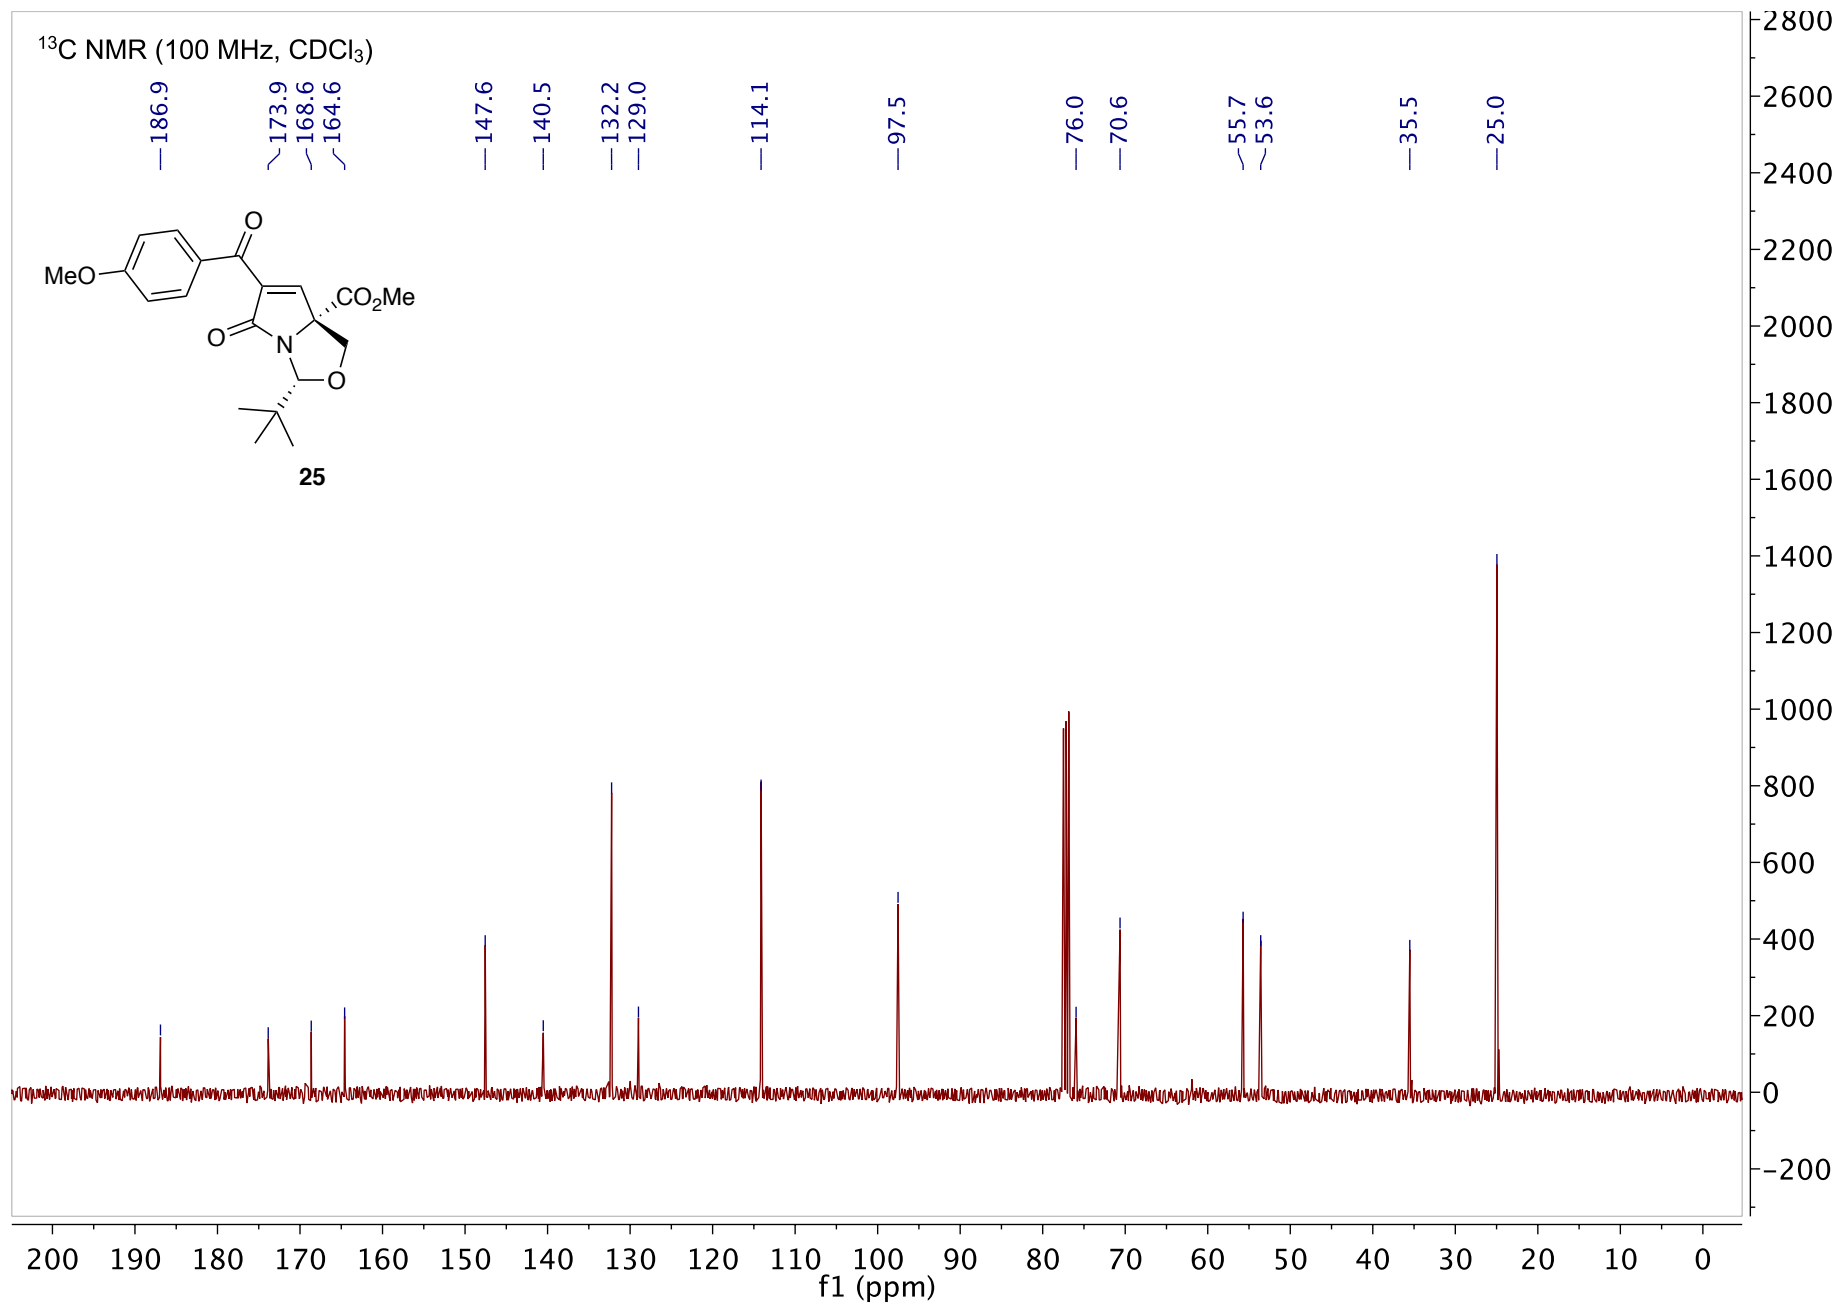

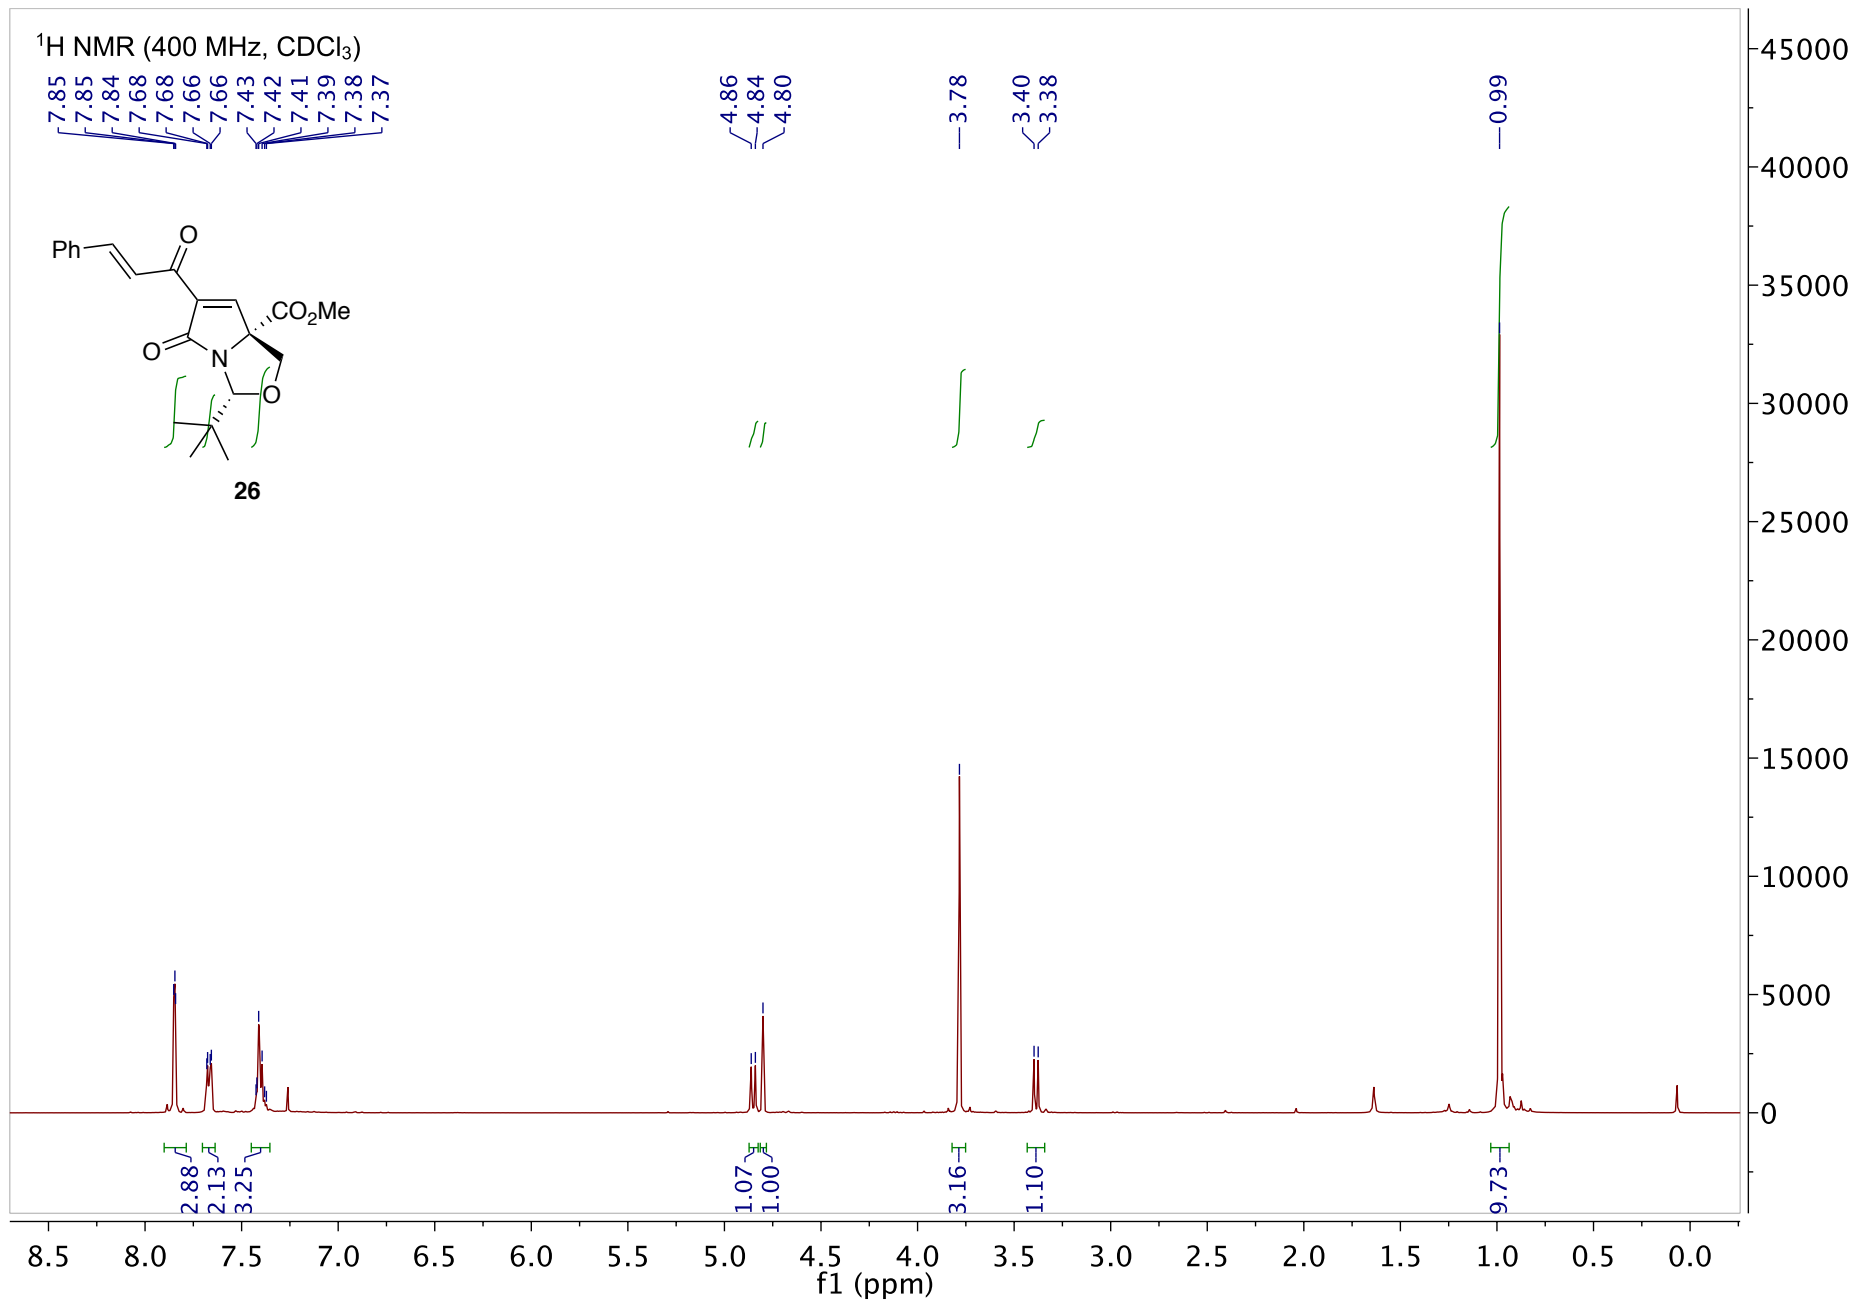

<sup>13</sup>C NMR (100 MHz, CDCl<sub>3</sub>)

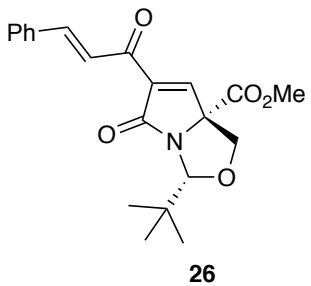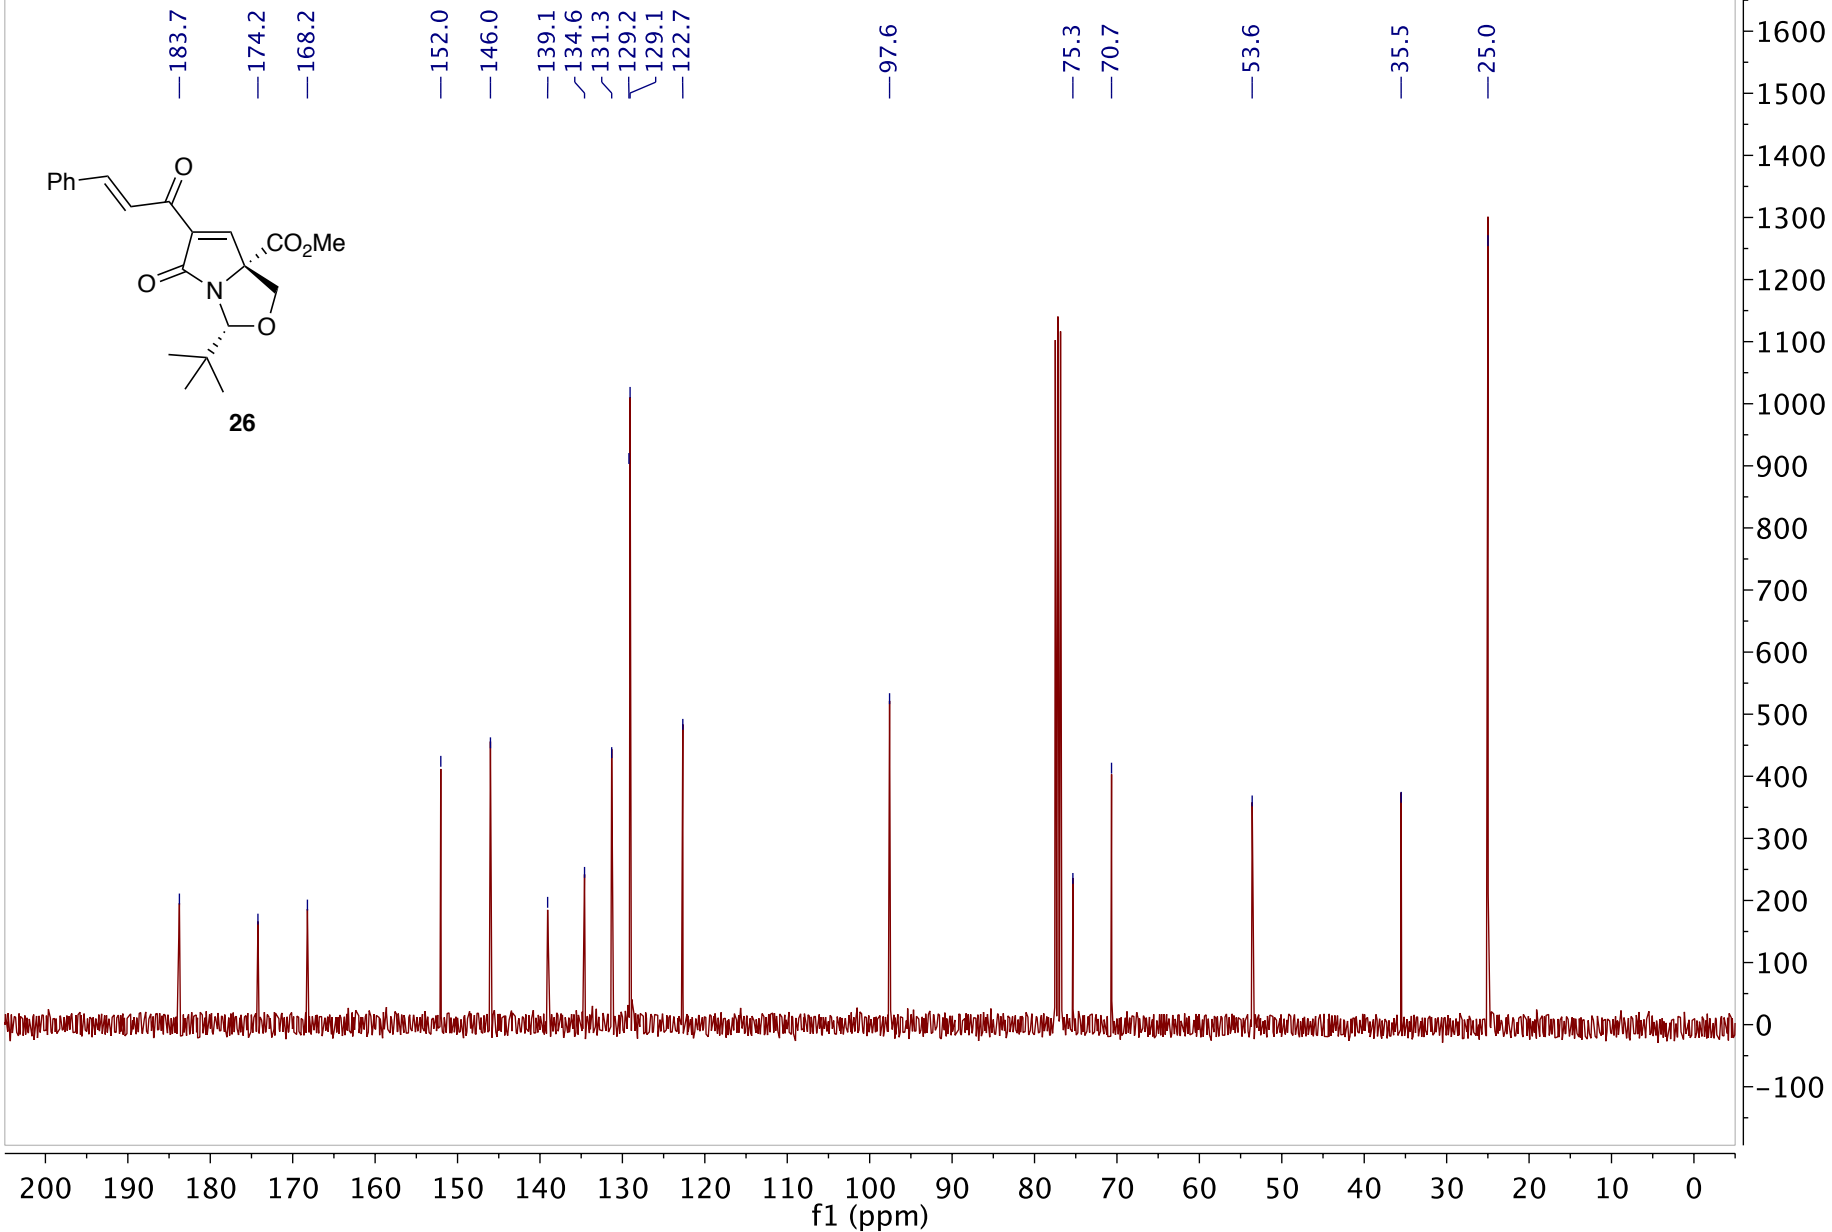

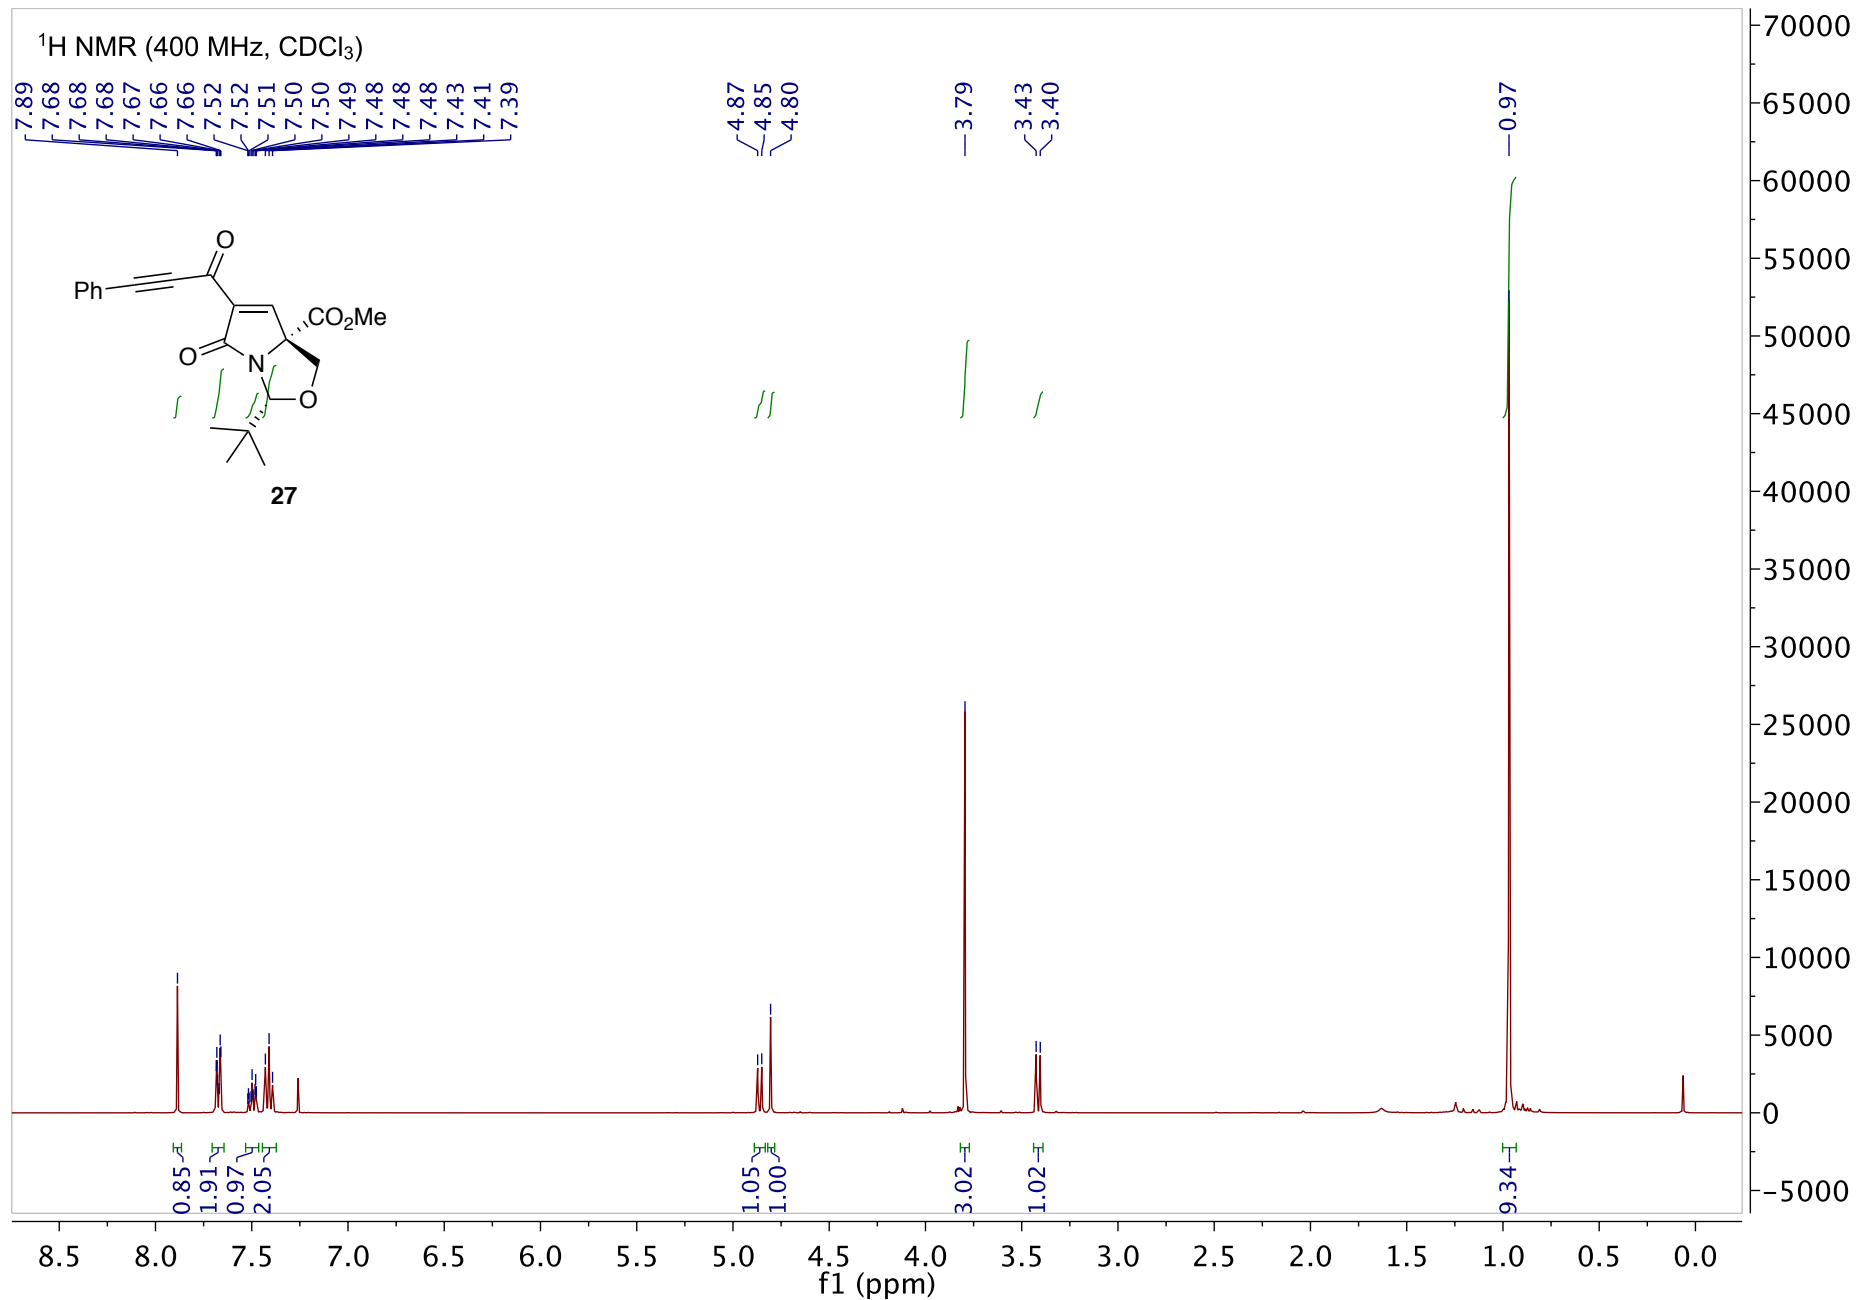

<sup>13</sup>C NMR (100 MHz, CDCl<sub>3</sub>)

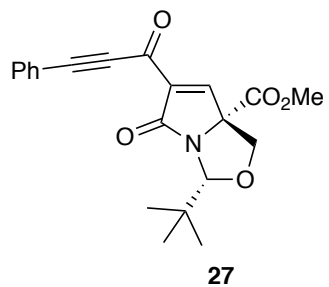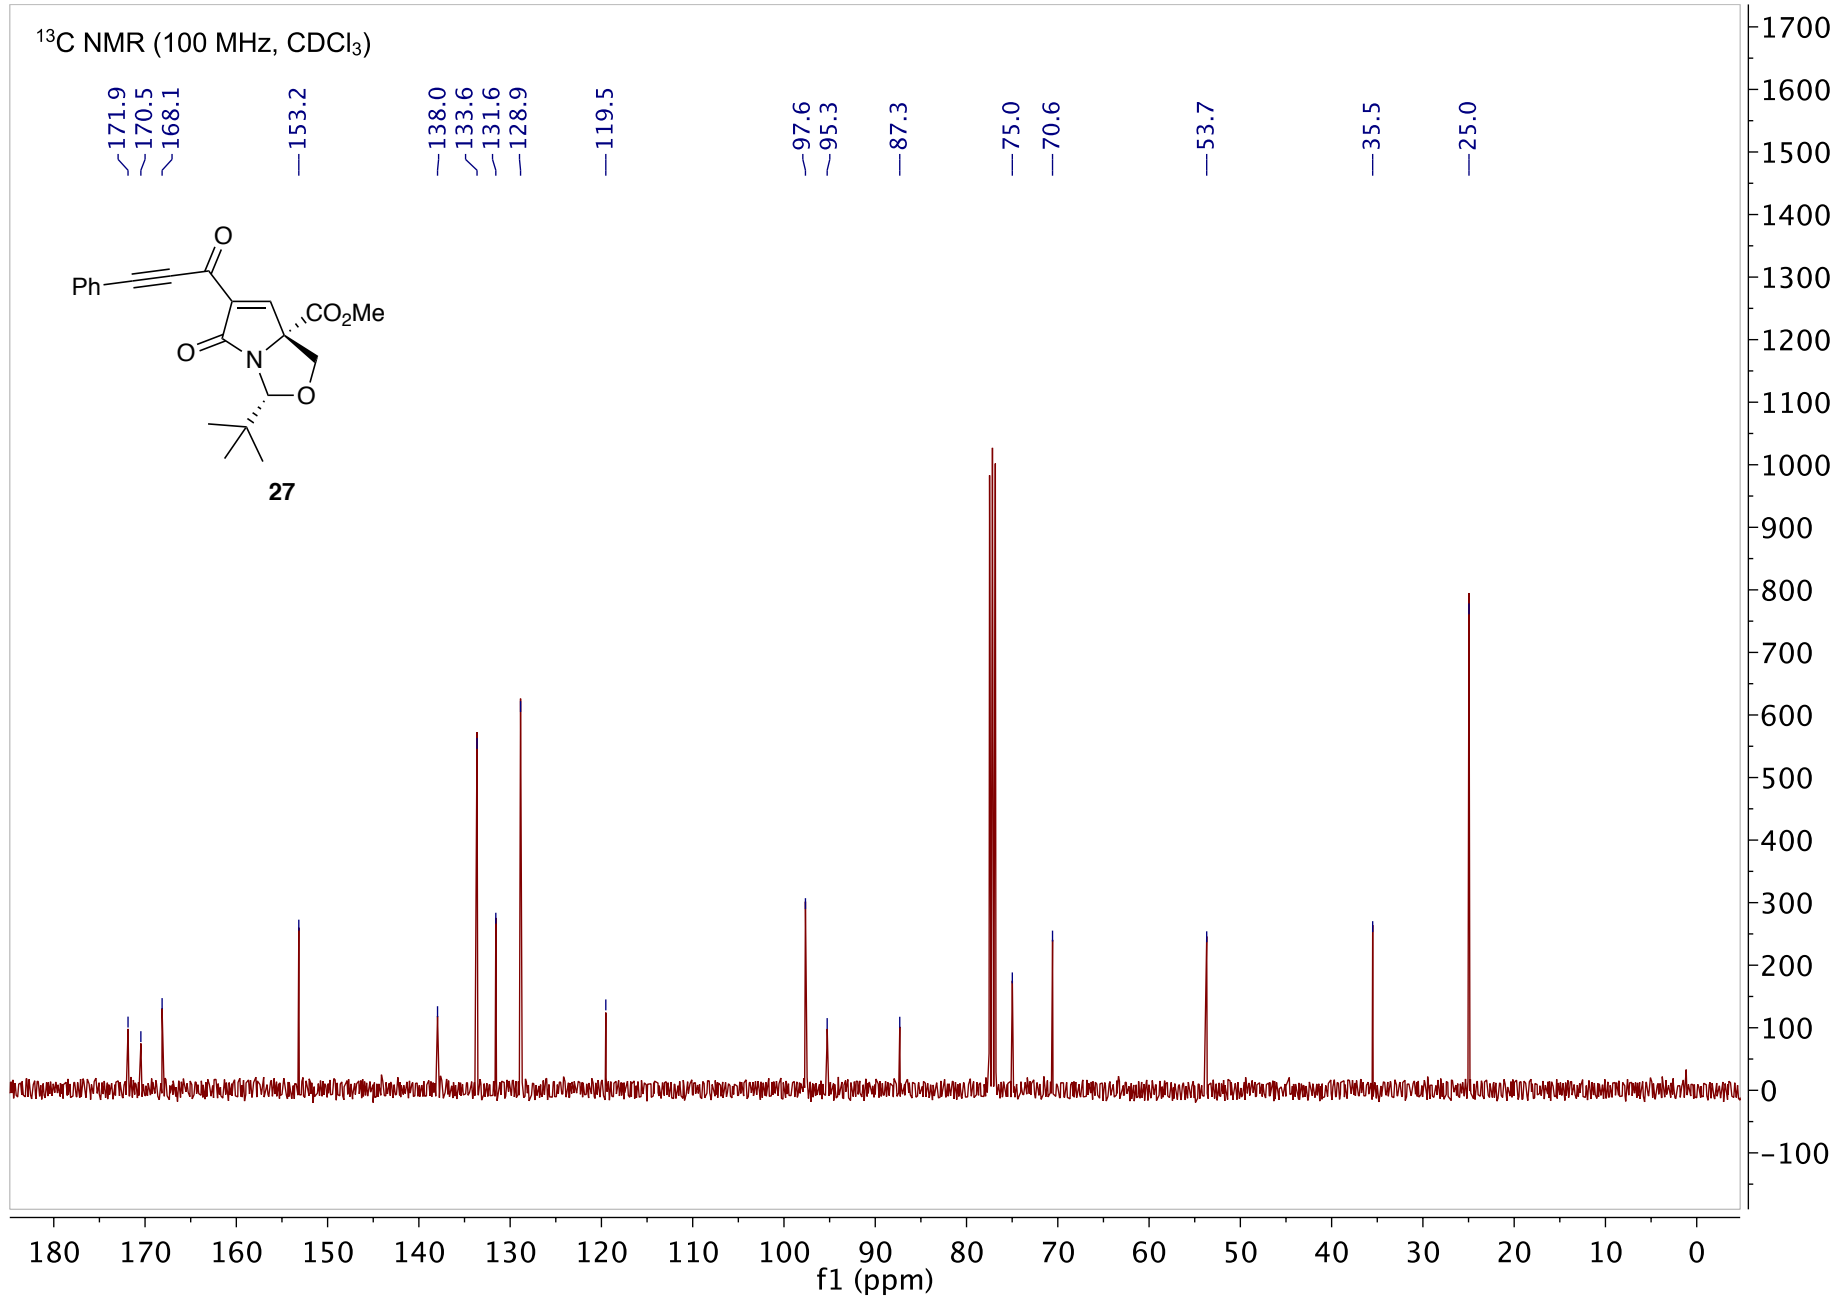



<sup>1</sup>H NMR (500 MHz, CDCl<sub>3</sub>)

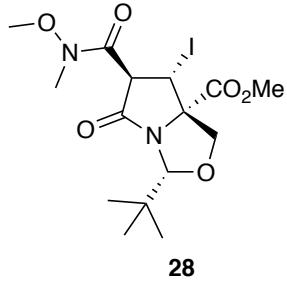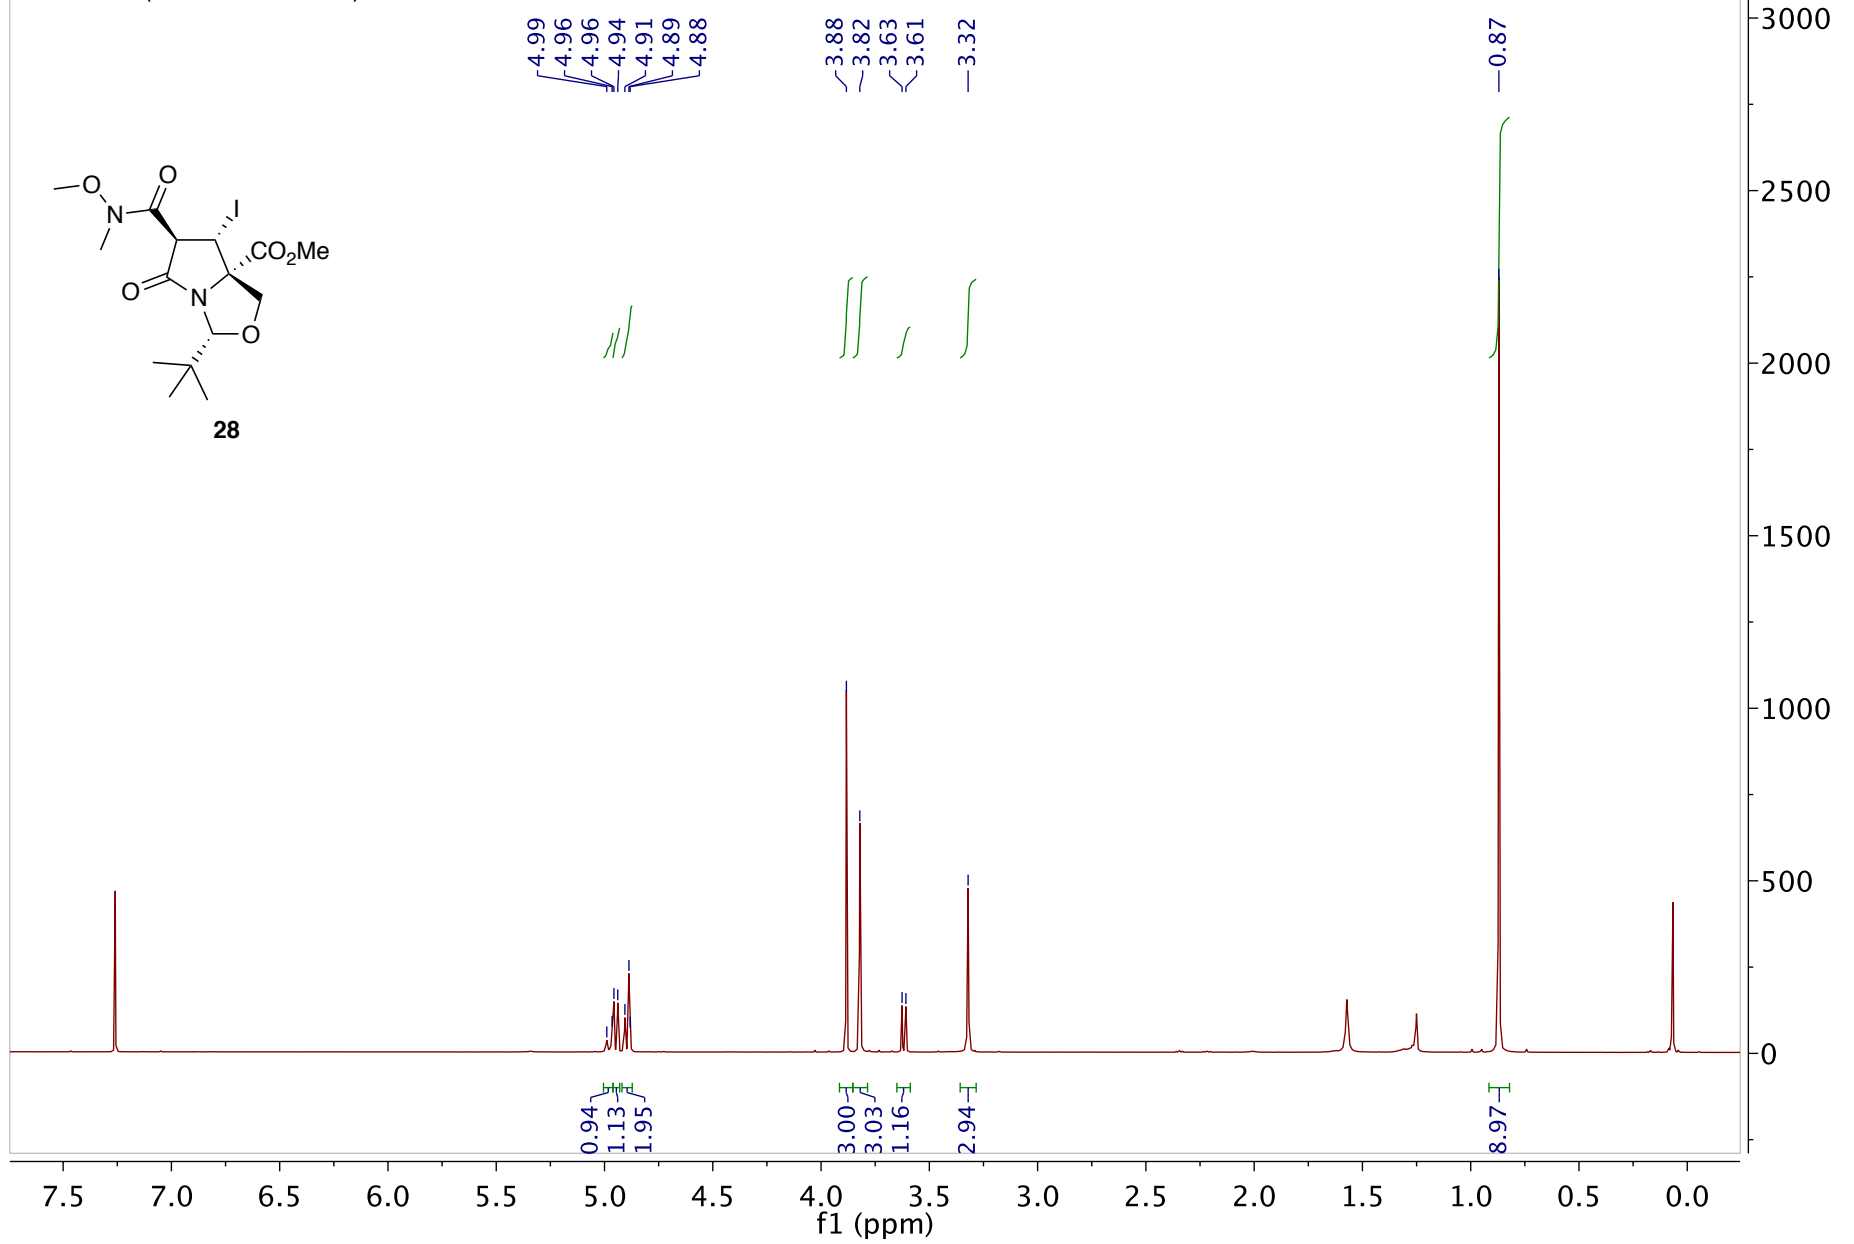

<sup>13</sup>C NMR (125 MHz, CDCl<sub>3</sub>)

170.3  
170.2  
165.9

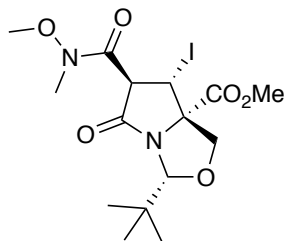

28

96.9

75.7

73.4

62.2

59.1

53.1

36.4

32.5

24.9

17.4

180 170 160 150 140 130 120 110 100 90 80 70 60 50 40 30 20 10 0

f1 (ppm)

100000

90000

80000

70000

60000

50000

40000

30000

20000

10000

0

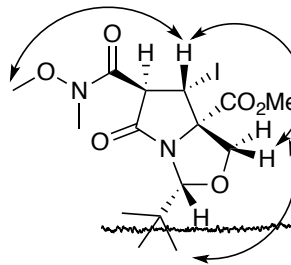

AVB500 1H TFI probe LAIA JOSA CULLERE 45494 PC: DMRZAR09 MGM 9/8/16 gradient NOE Tmix = 800msec

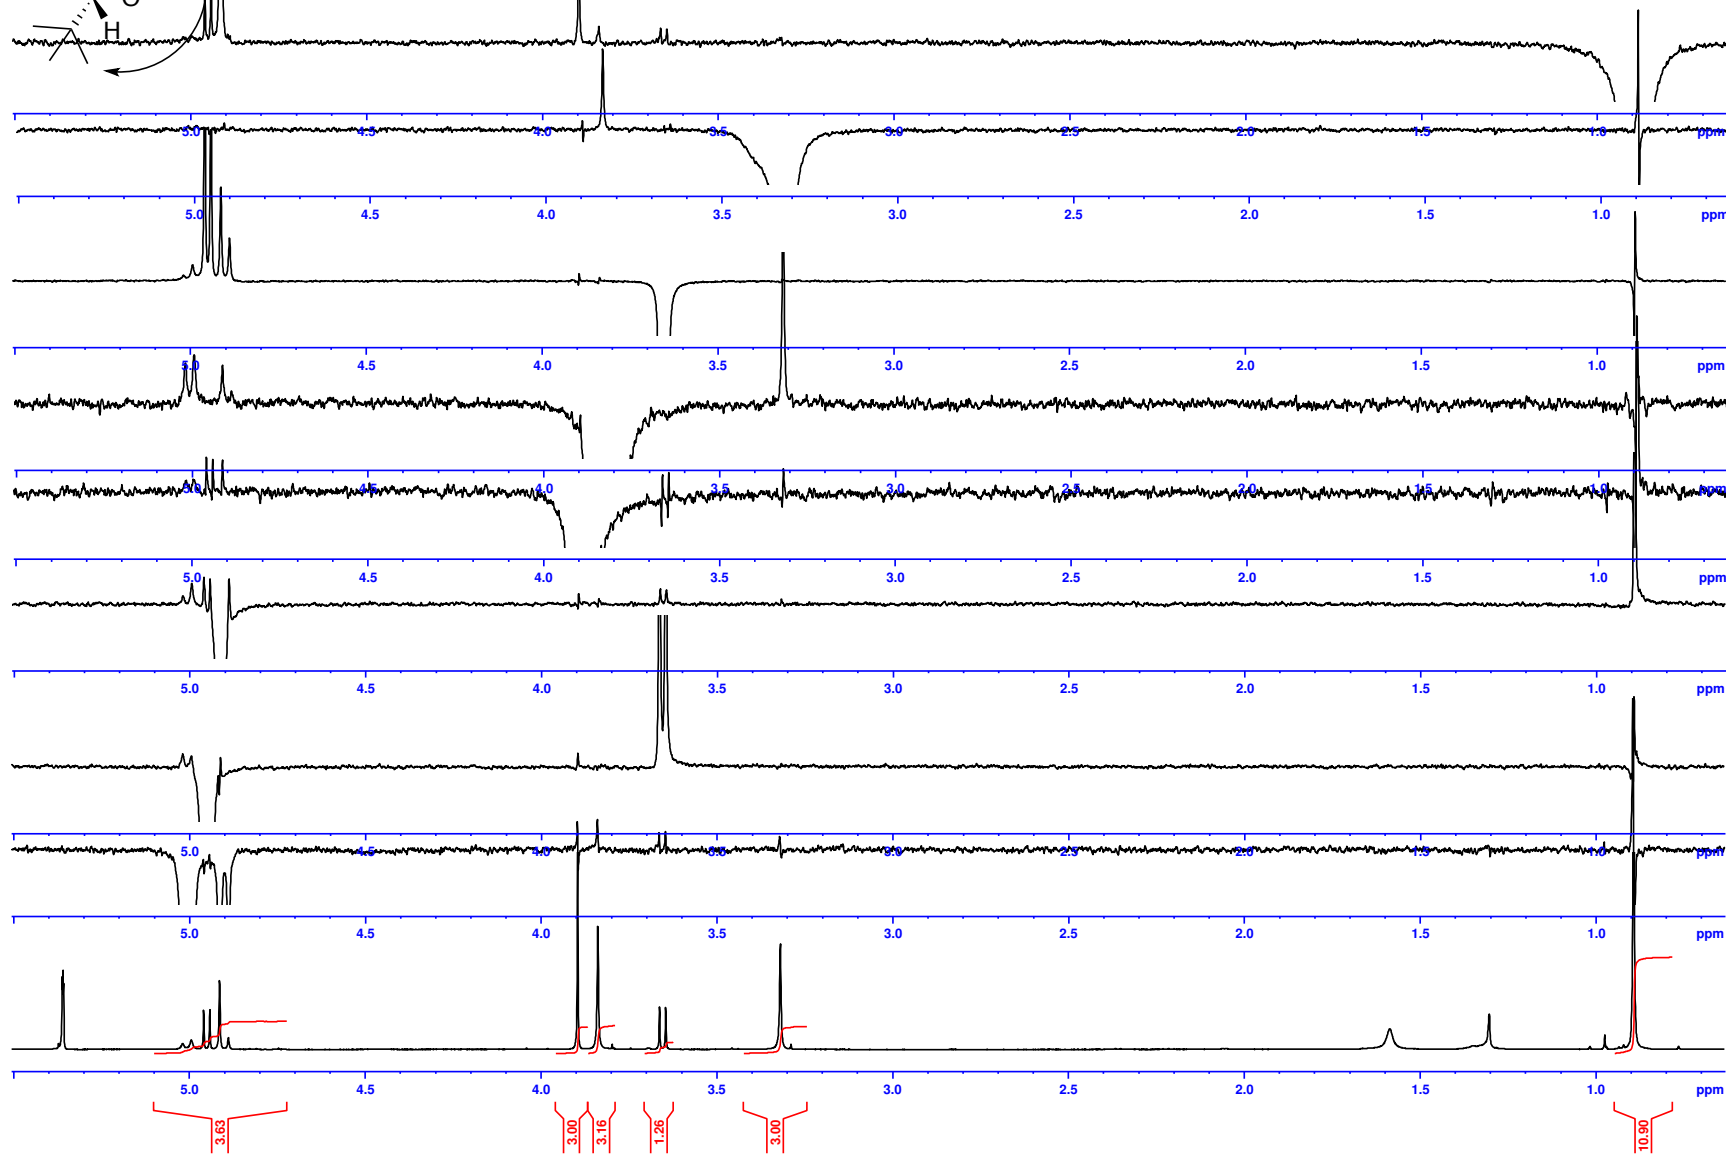

<sup>1</sup>H NMR (500 MHz, CDCl<sub>3</sub>)

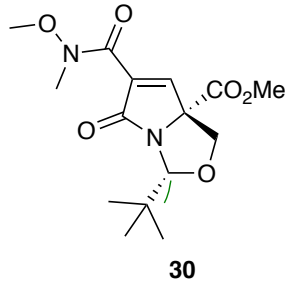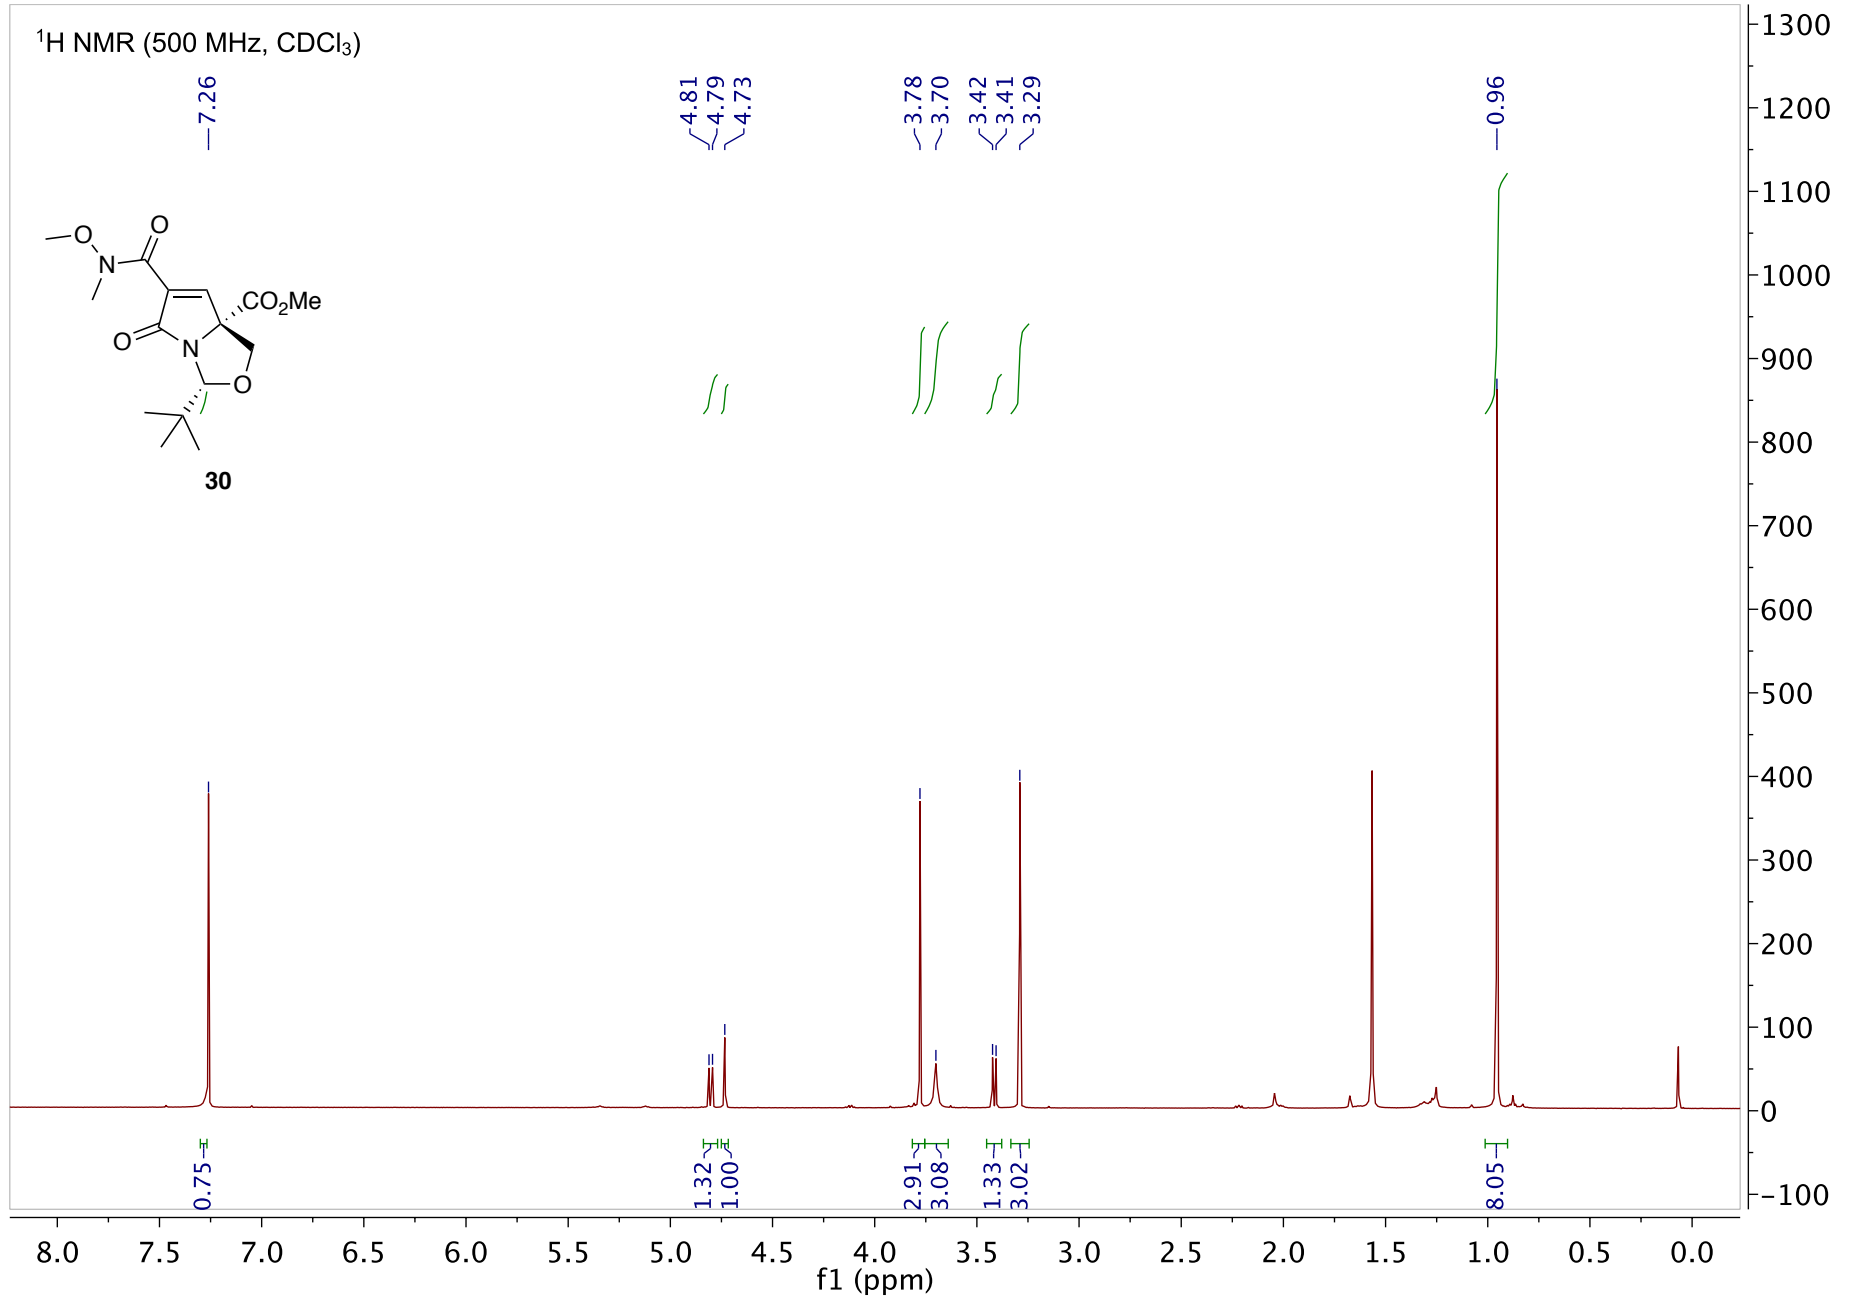

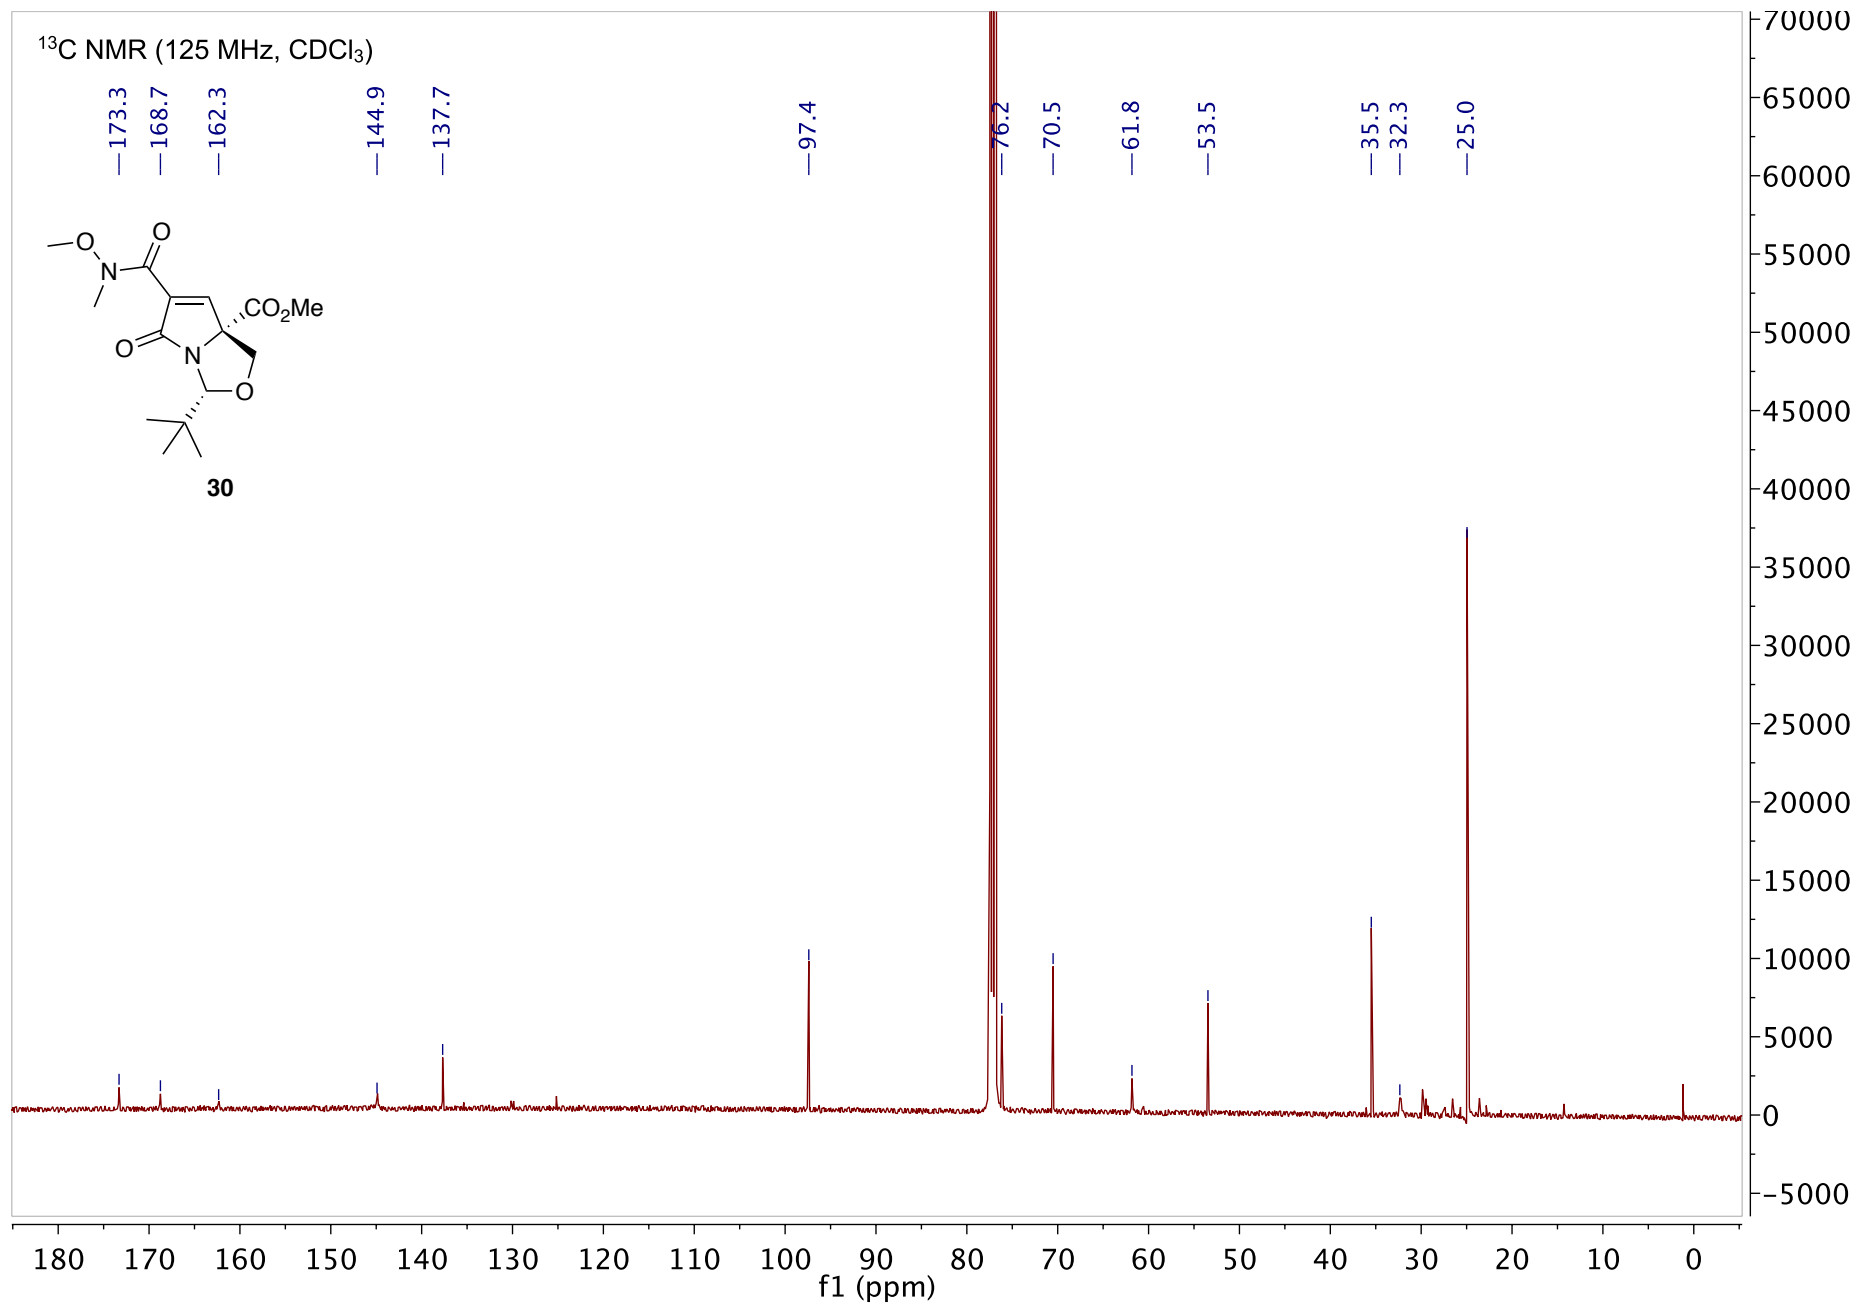

<sup>1</sup>H NMR (400 MHz, CDCl<sub>3</sub>)

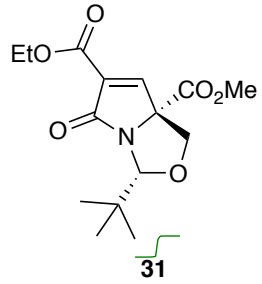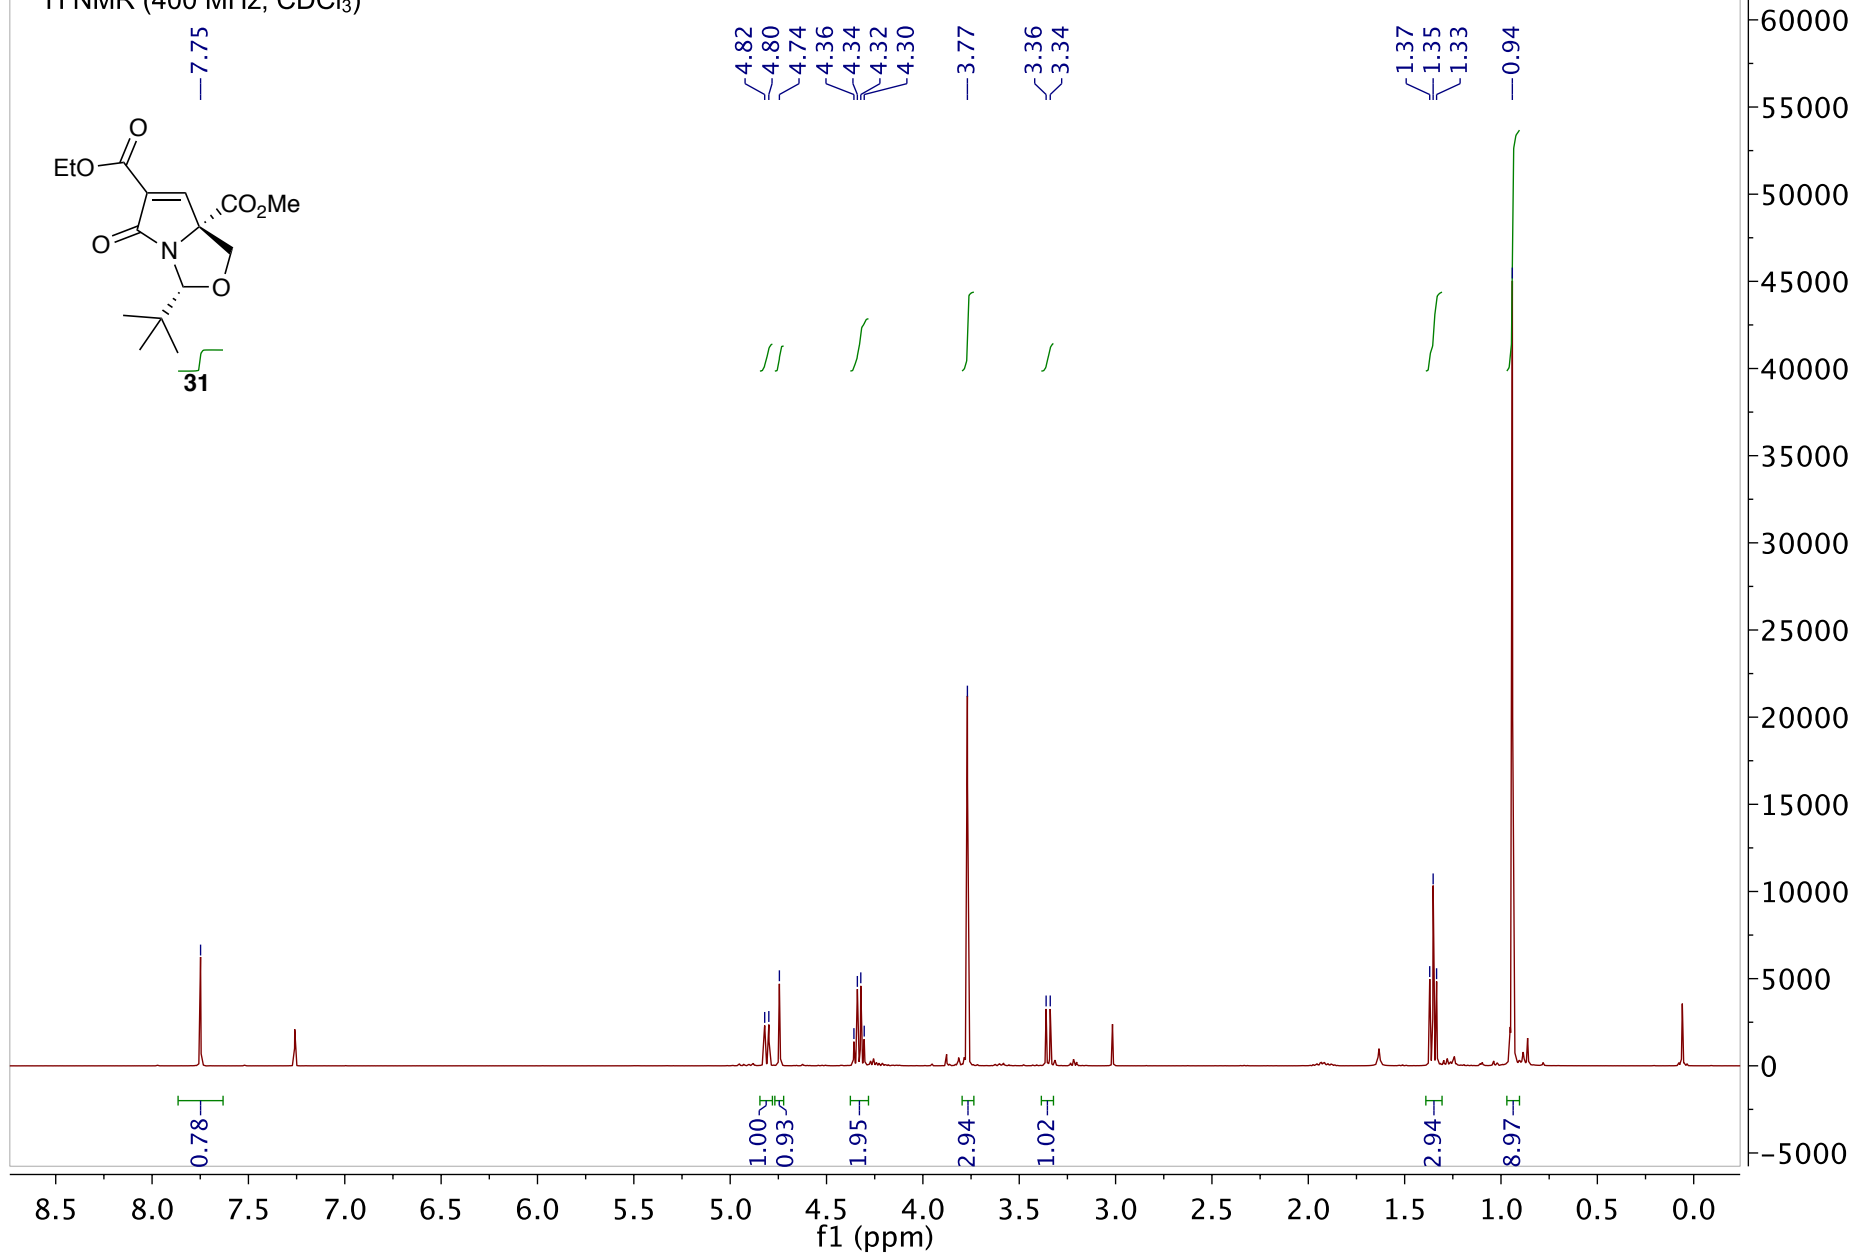

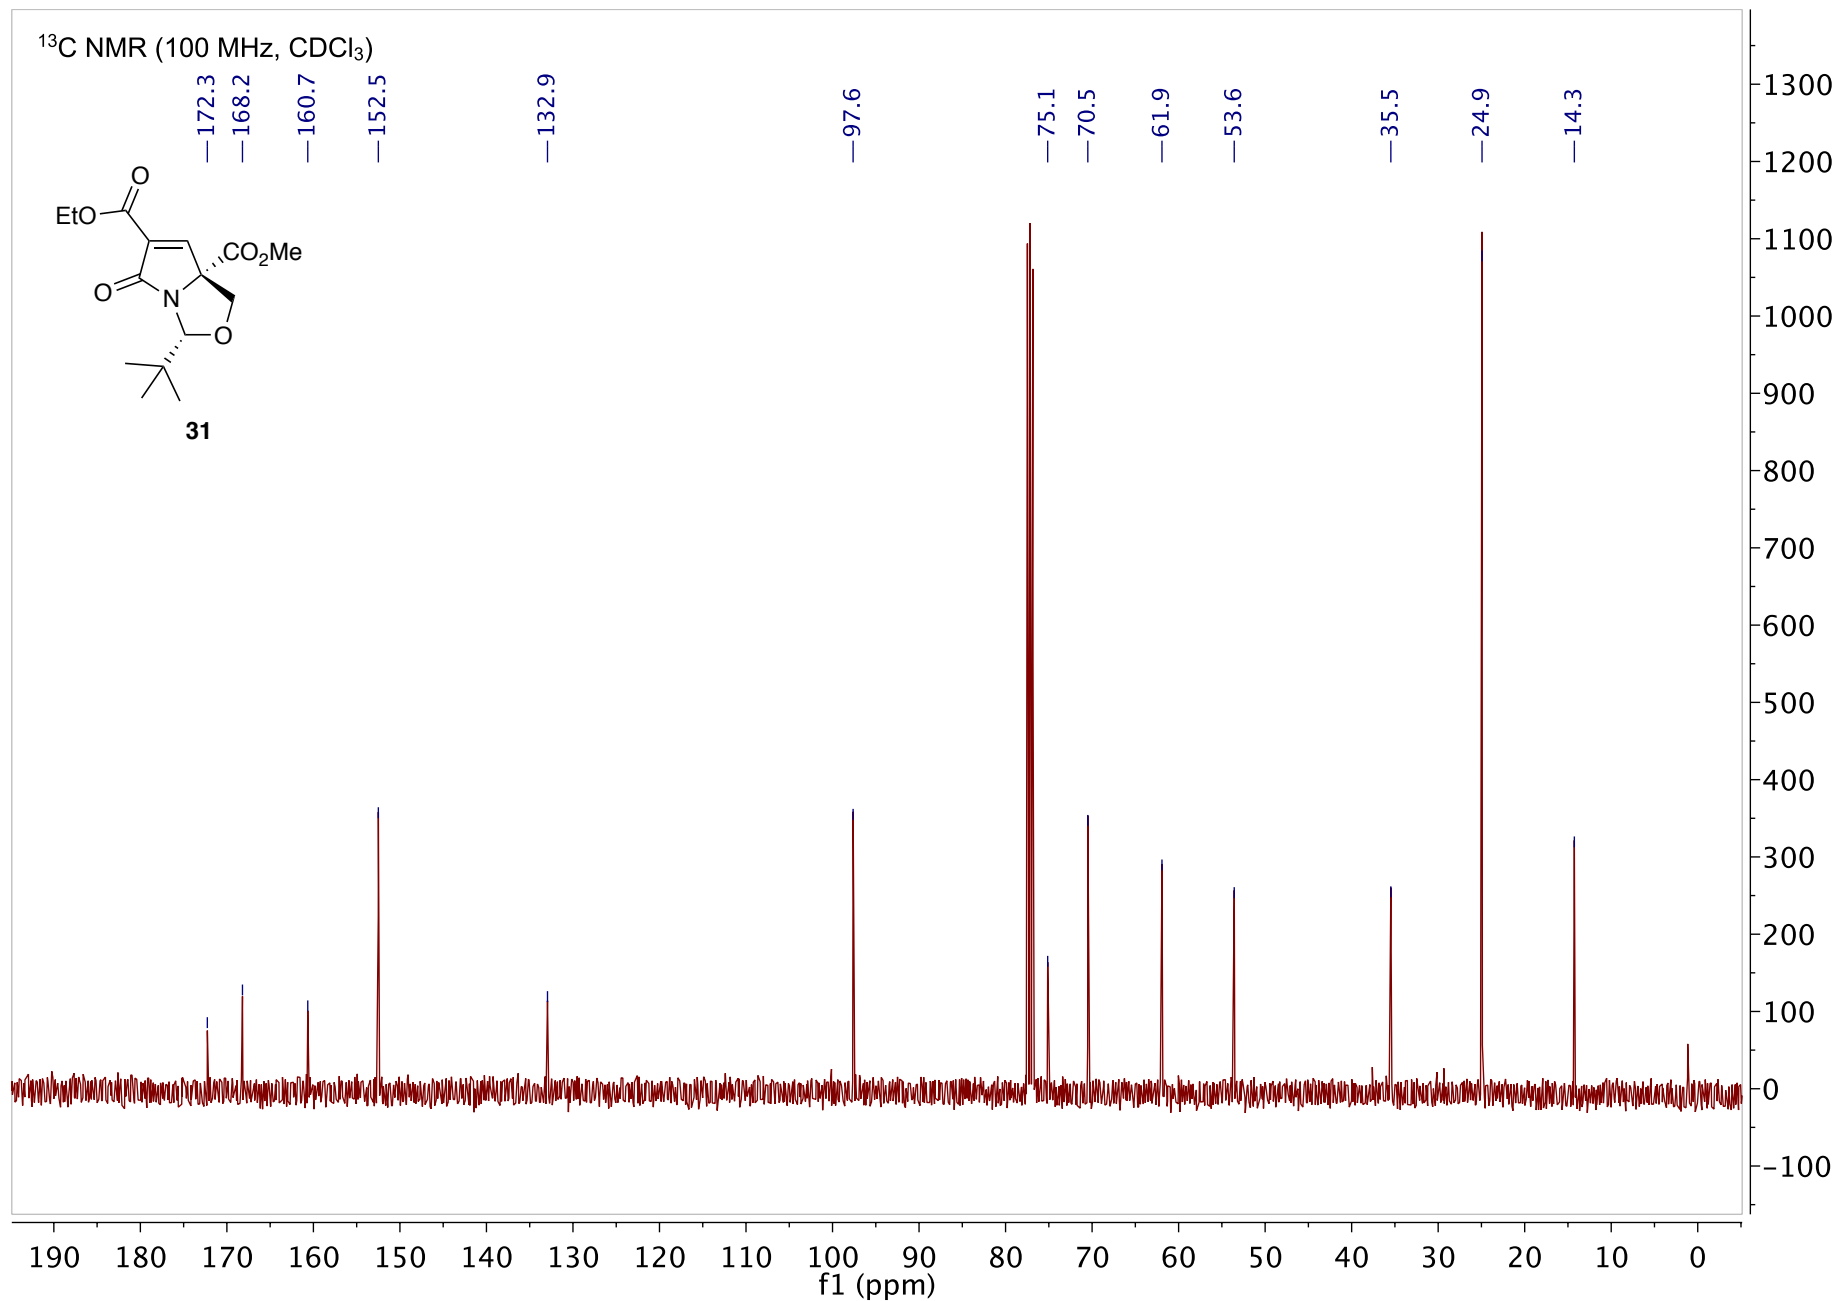

Supplement: c8ob00187a2.pdf [file c8ob00187a2.pdf]
